# Supplementary material
Source: publisher figshare collection journal article supplement (https://frontiersin.figshare.com/ndownloader/files/27907686)

ICA200,69

ICA component: HCP-mean\_component\_ica\_s\_all\_69

ICN template: ...Noise\_artifact

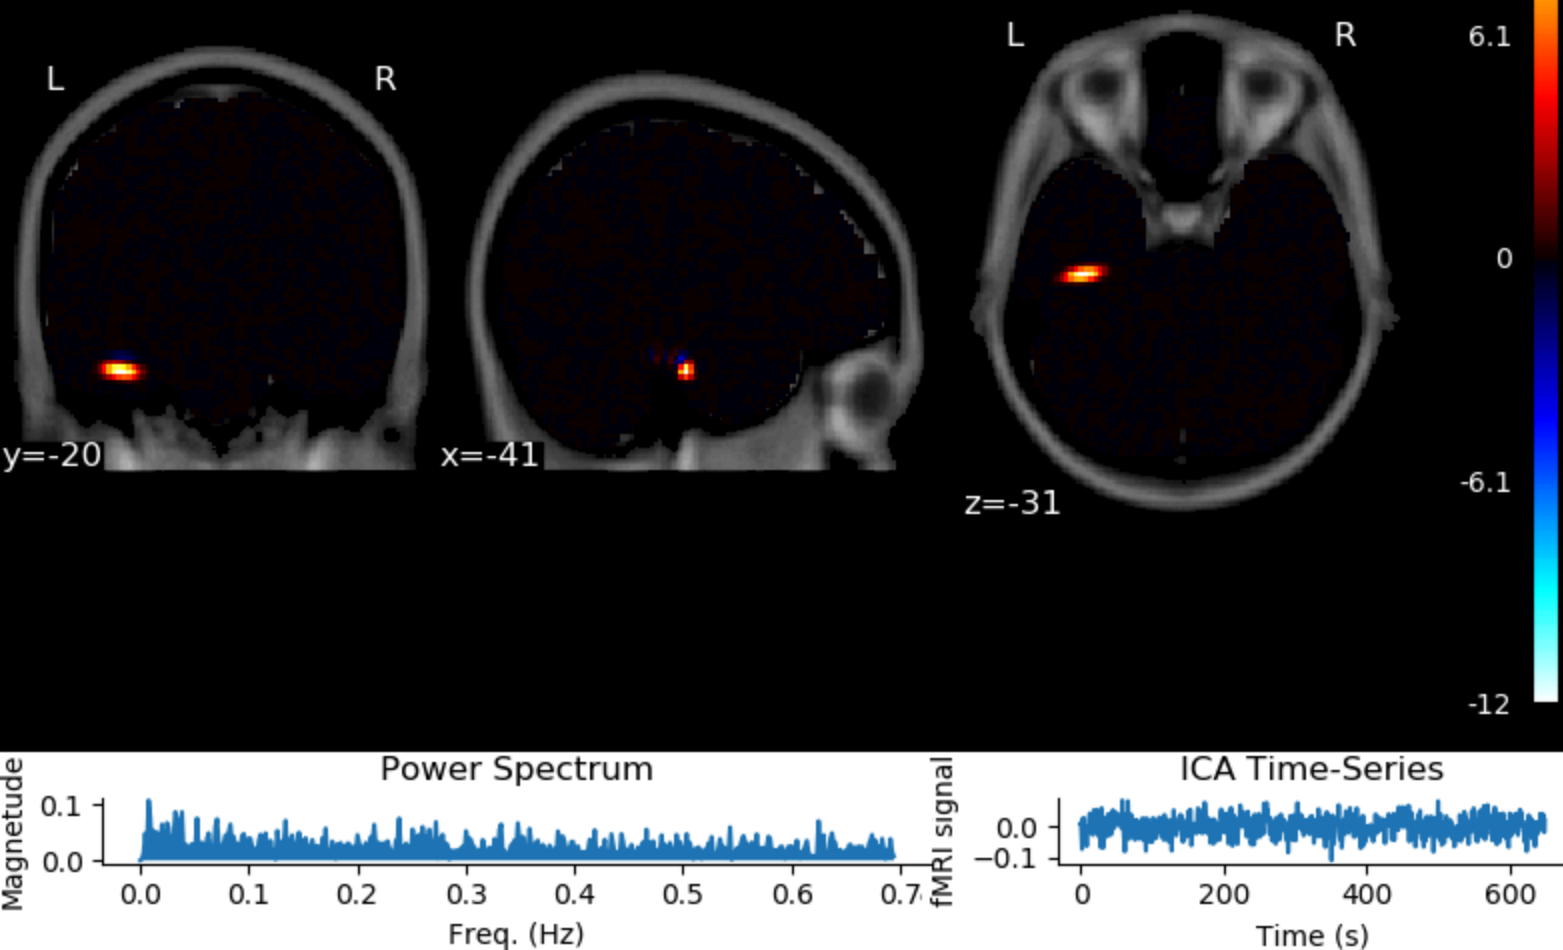

ICA200,76

ICA component: HCP-mean\_component\_ica\_s\_all\_76

ICN template: ...Noise\_artifact

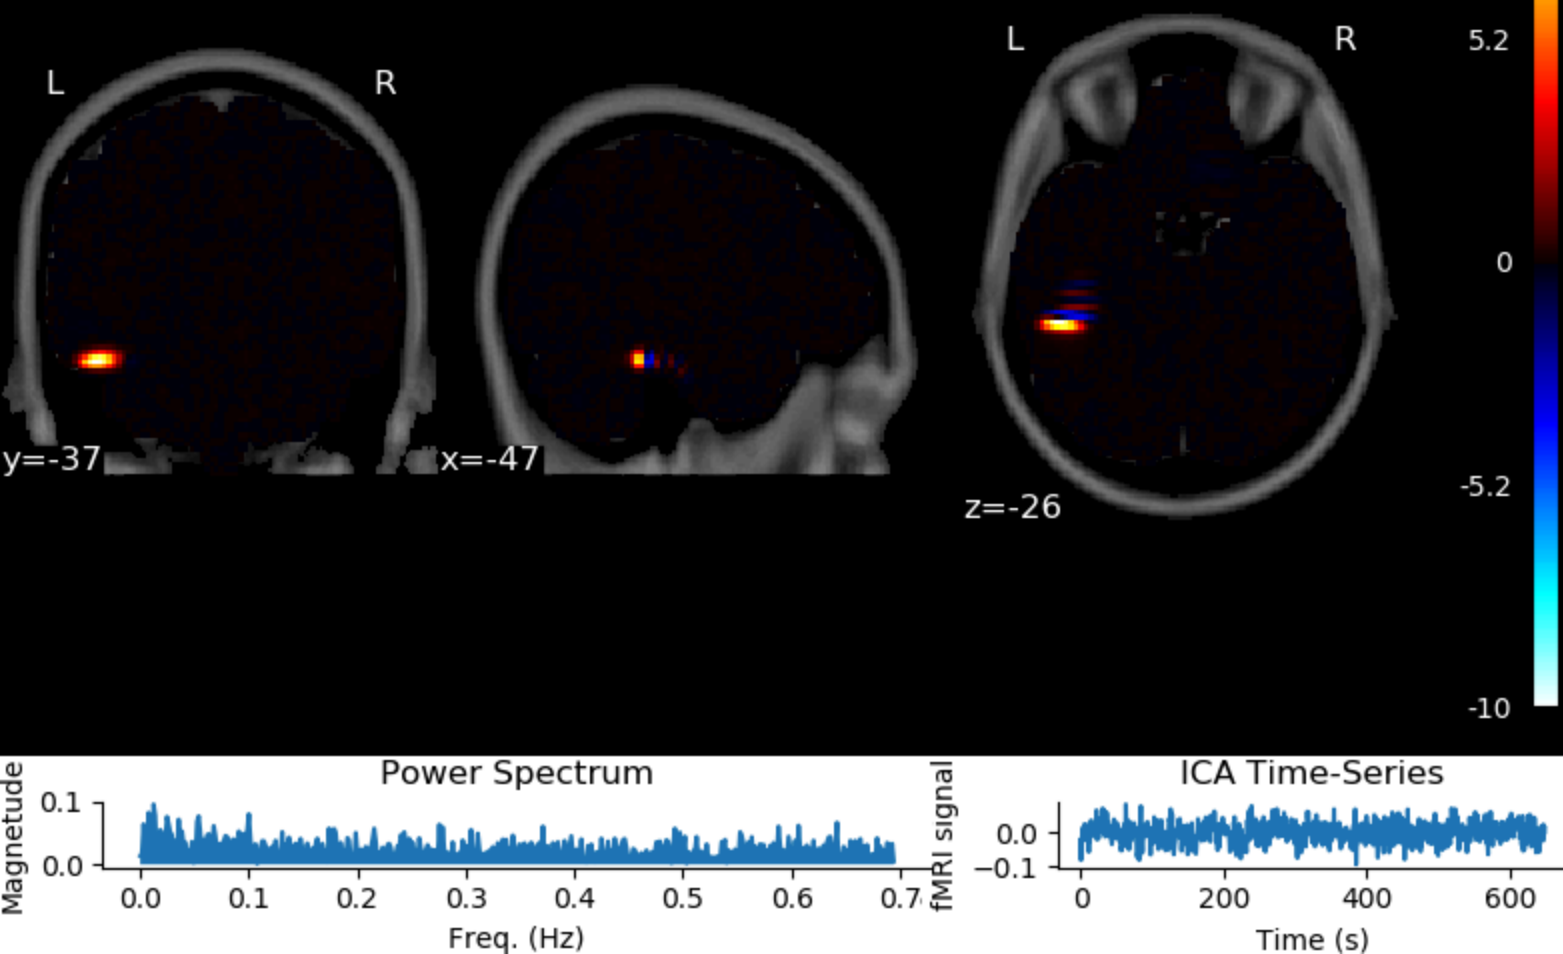

ICA200,99

ICA component: HCP-mean\_component\_ica\_s\_all\_99

ICN template: ...Noise\_artifact

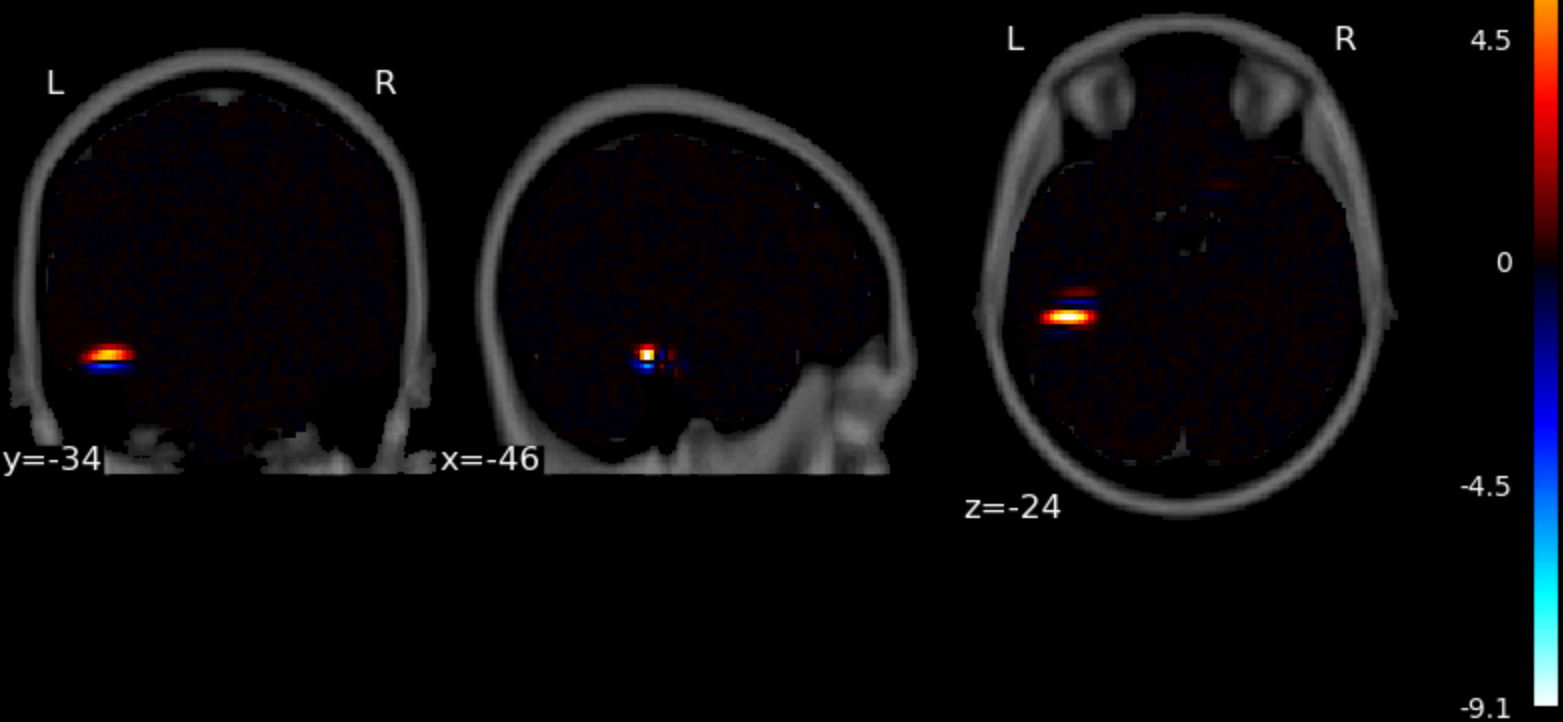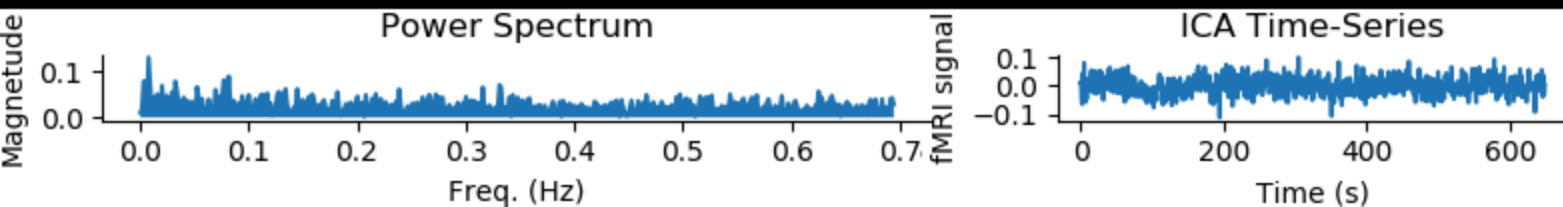

ICA200,121

ICA component: HCP\_mean\_component\_ica\_s\_all\_121

ICN template: ...Noise\_artifact

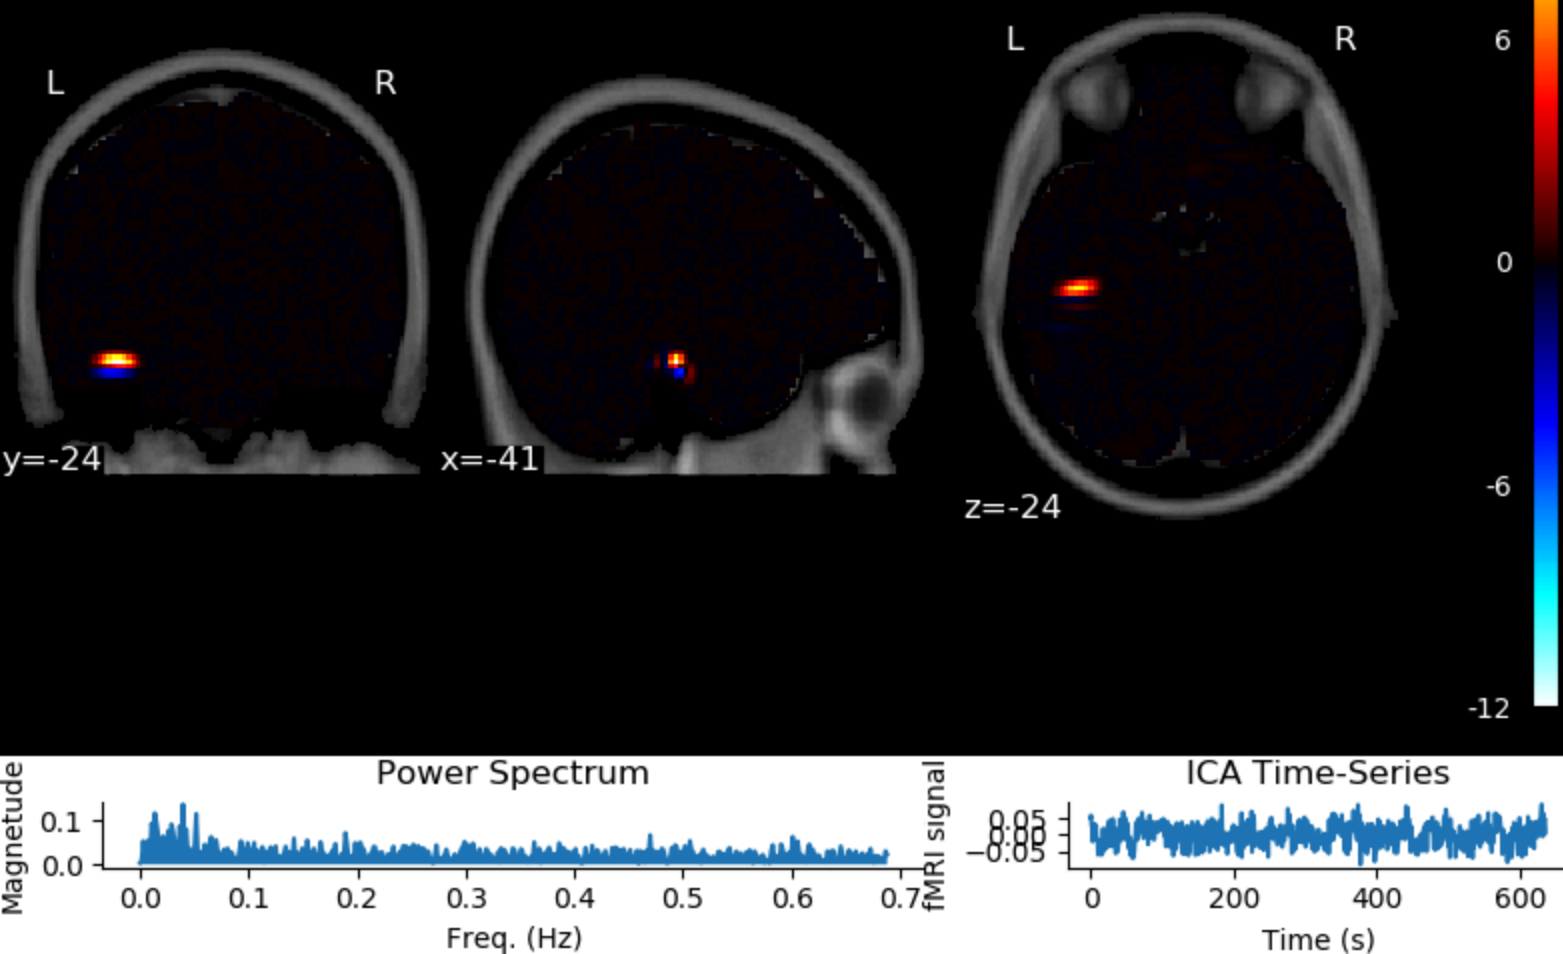

ICA200,122

ICA component: HCP\_mean\_component\_ica\_s\_all\_122

ICN template: ...Noise\_artifact

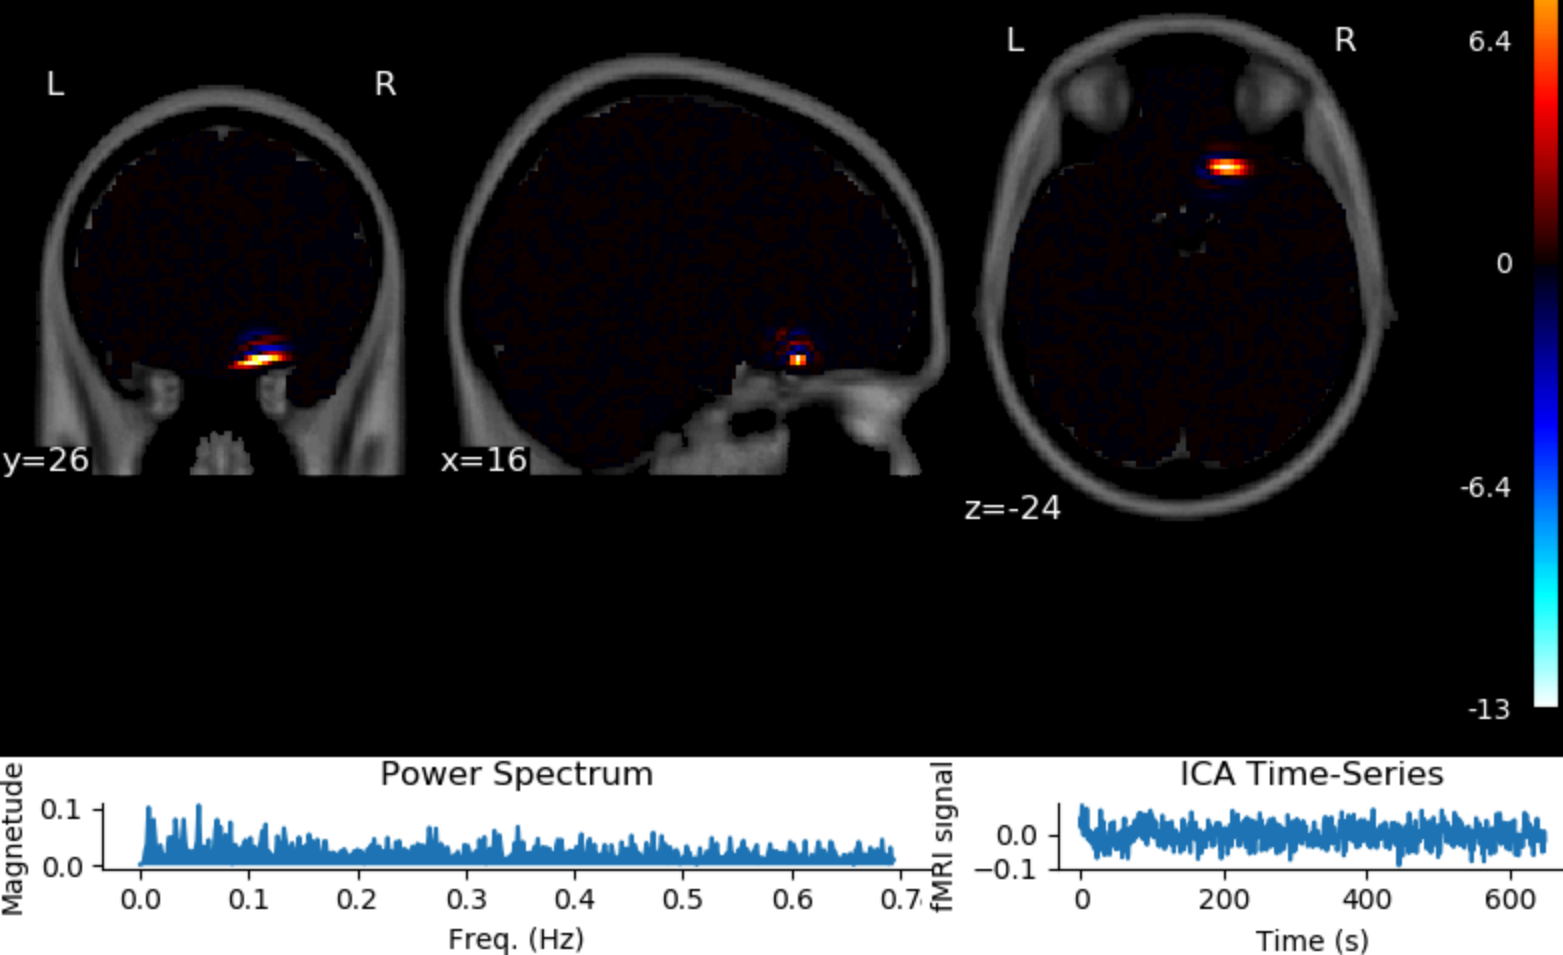

ICA200,124

ICA component: HCP-mean\_component\_ica\_s\_all\_124

ICN template: ...Noise\_artifact

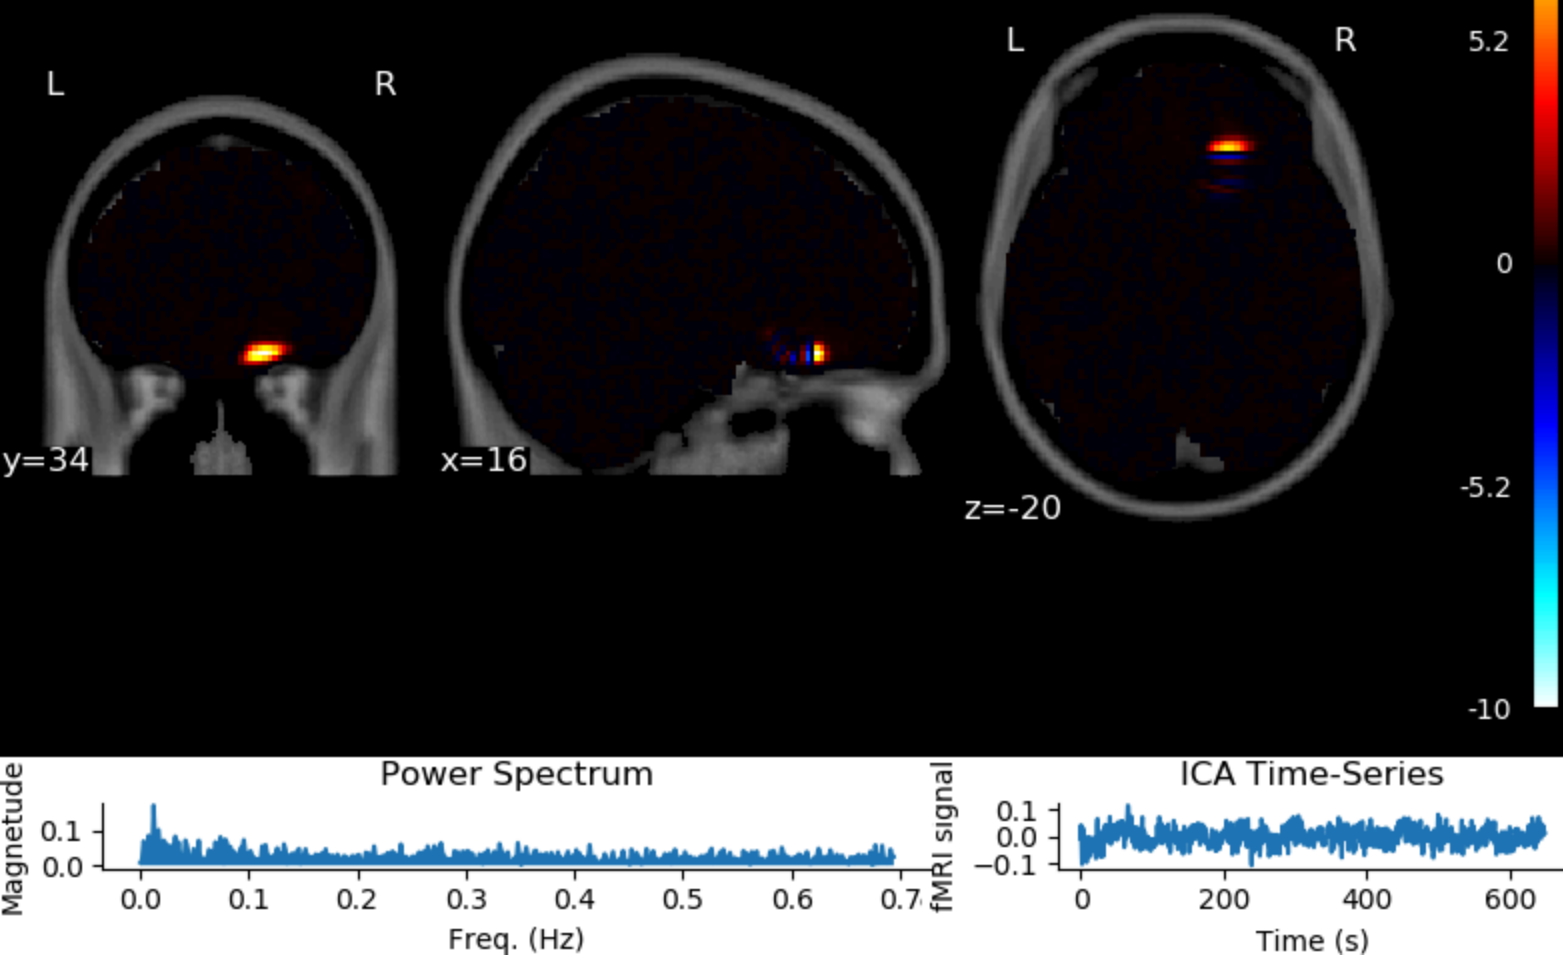

ICA200,125

ICA component: HCP-mean\_component\_ica\_s\_all\_125

ICN template: ...Noise\_artifact

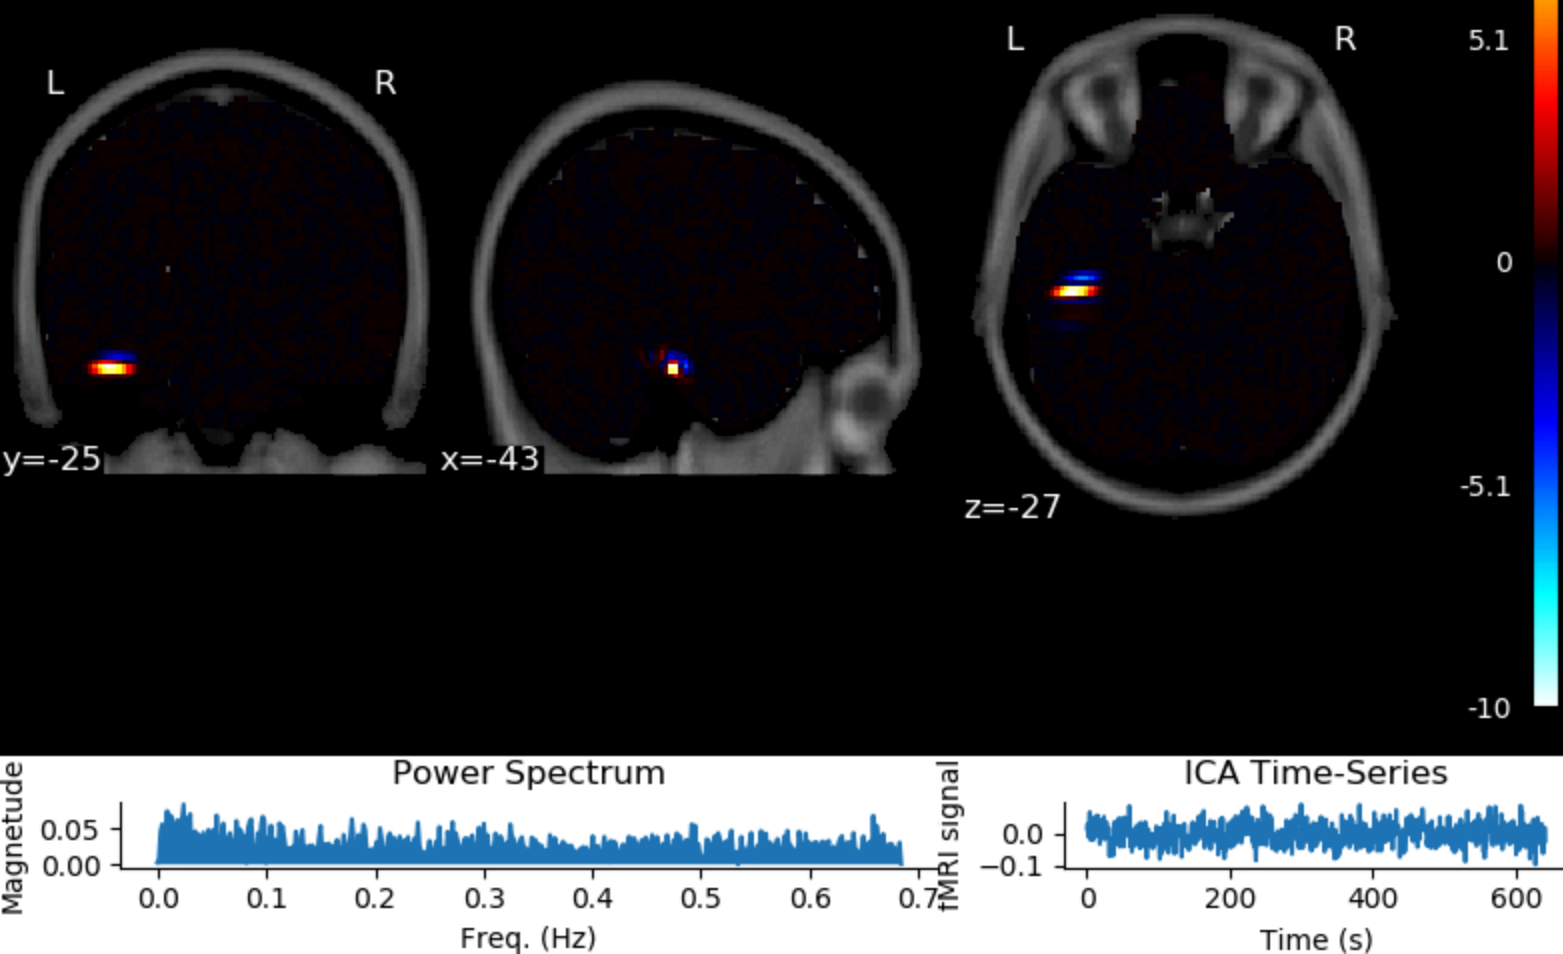

ICA200,129

ICA component: HCP\_mean\_component\_ica\_s\_all\_129

ICN template: ...Noise\_artifact

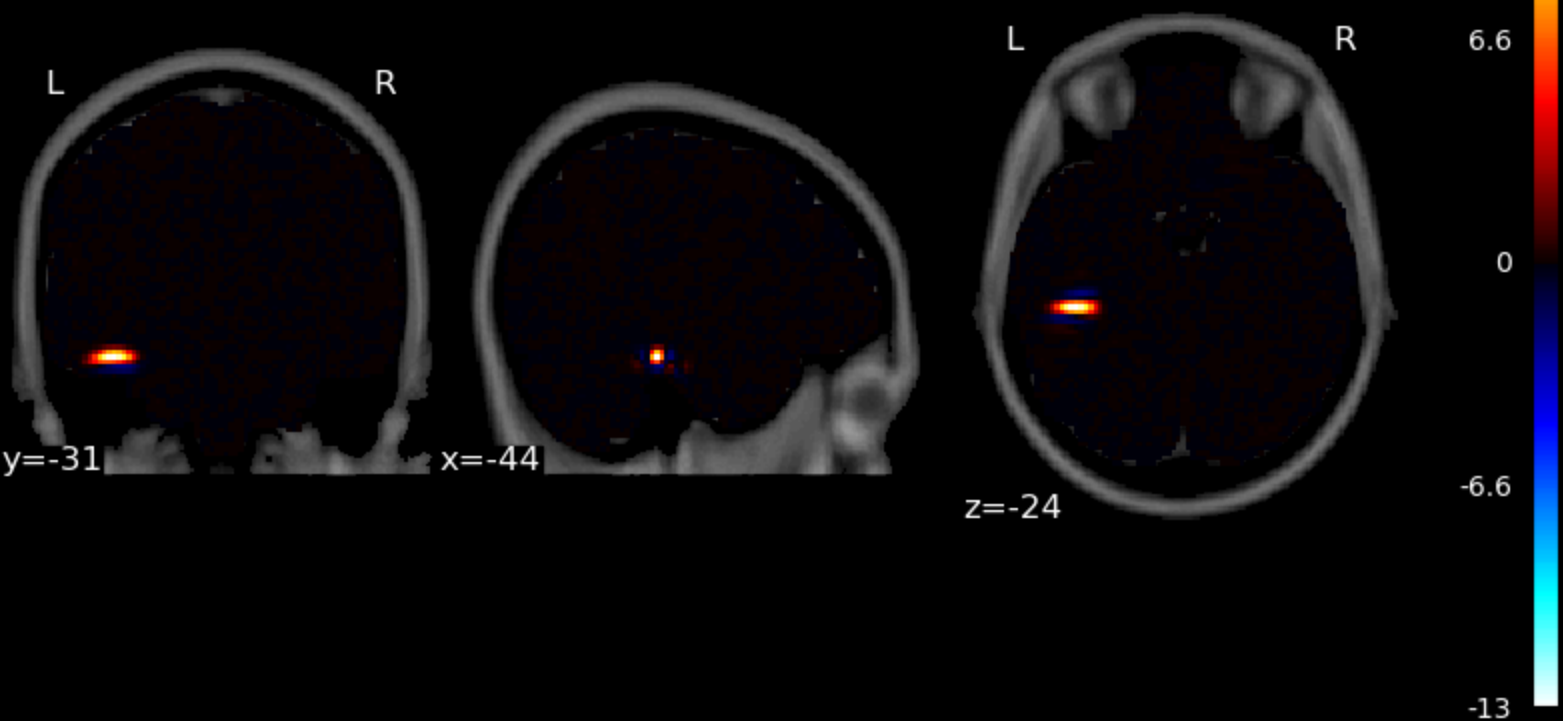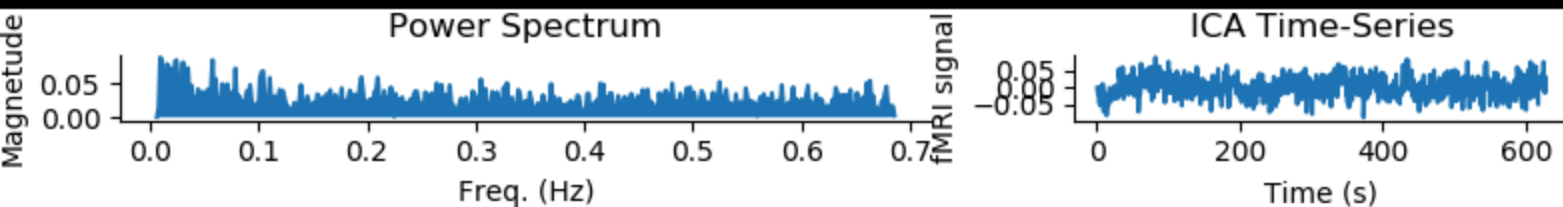



ICA200,132

ICA component: HCP-mean\_component\_ica\_s\_all\_132

ICN template: ...Noise\_artifact

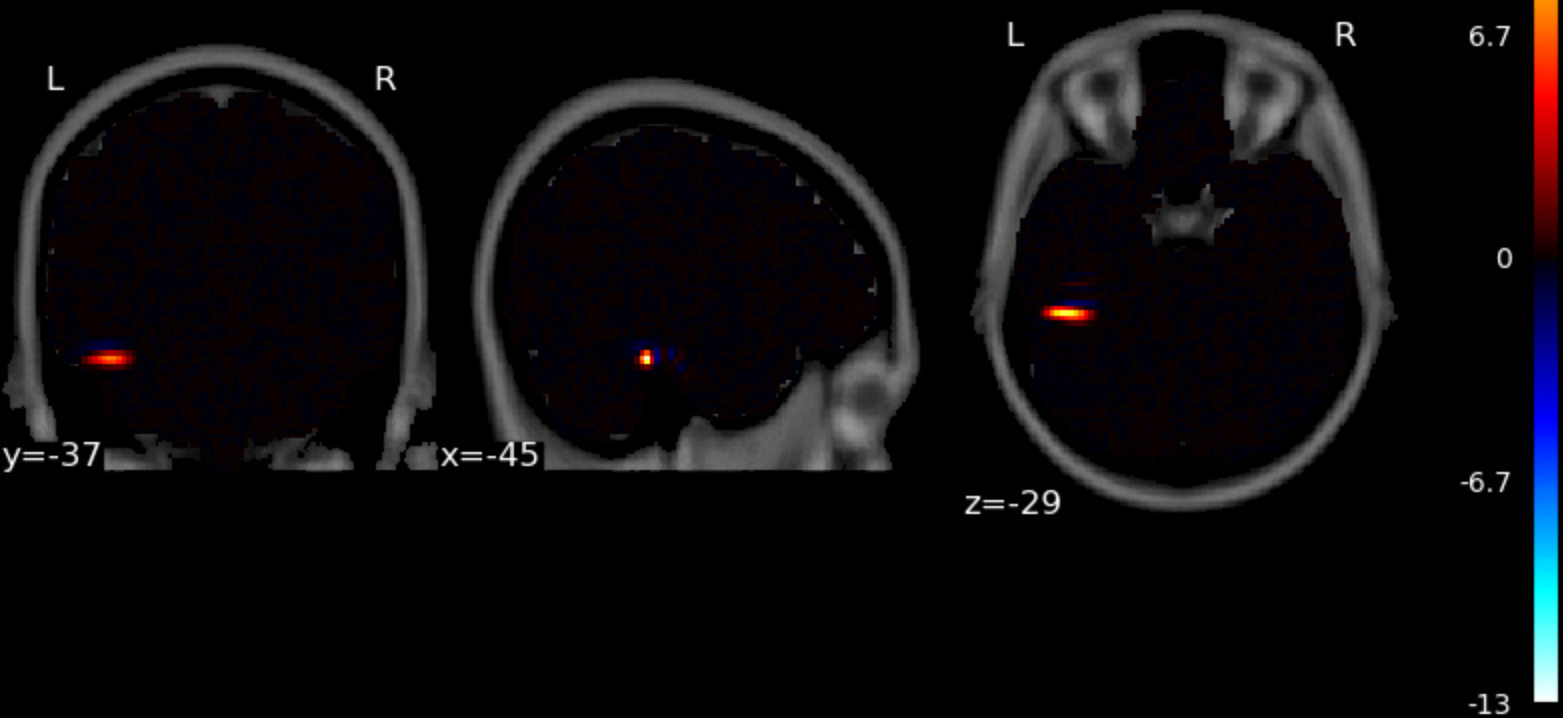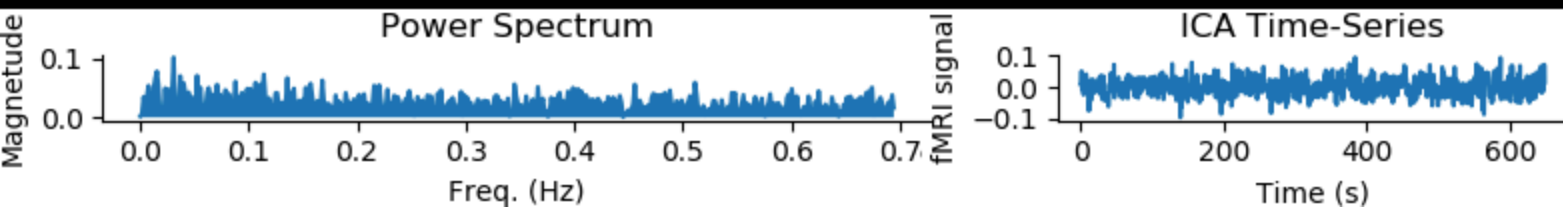

ICA200,133

ICA component: HCP-mean\_component\_ica\_s\_all\_133

ICN template: ...Noise\_artifact

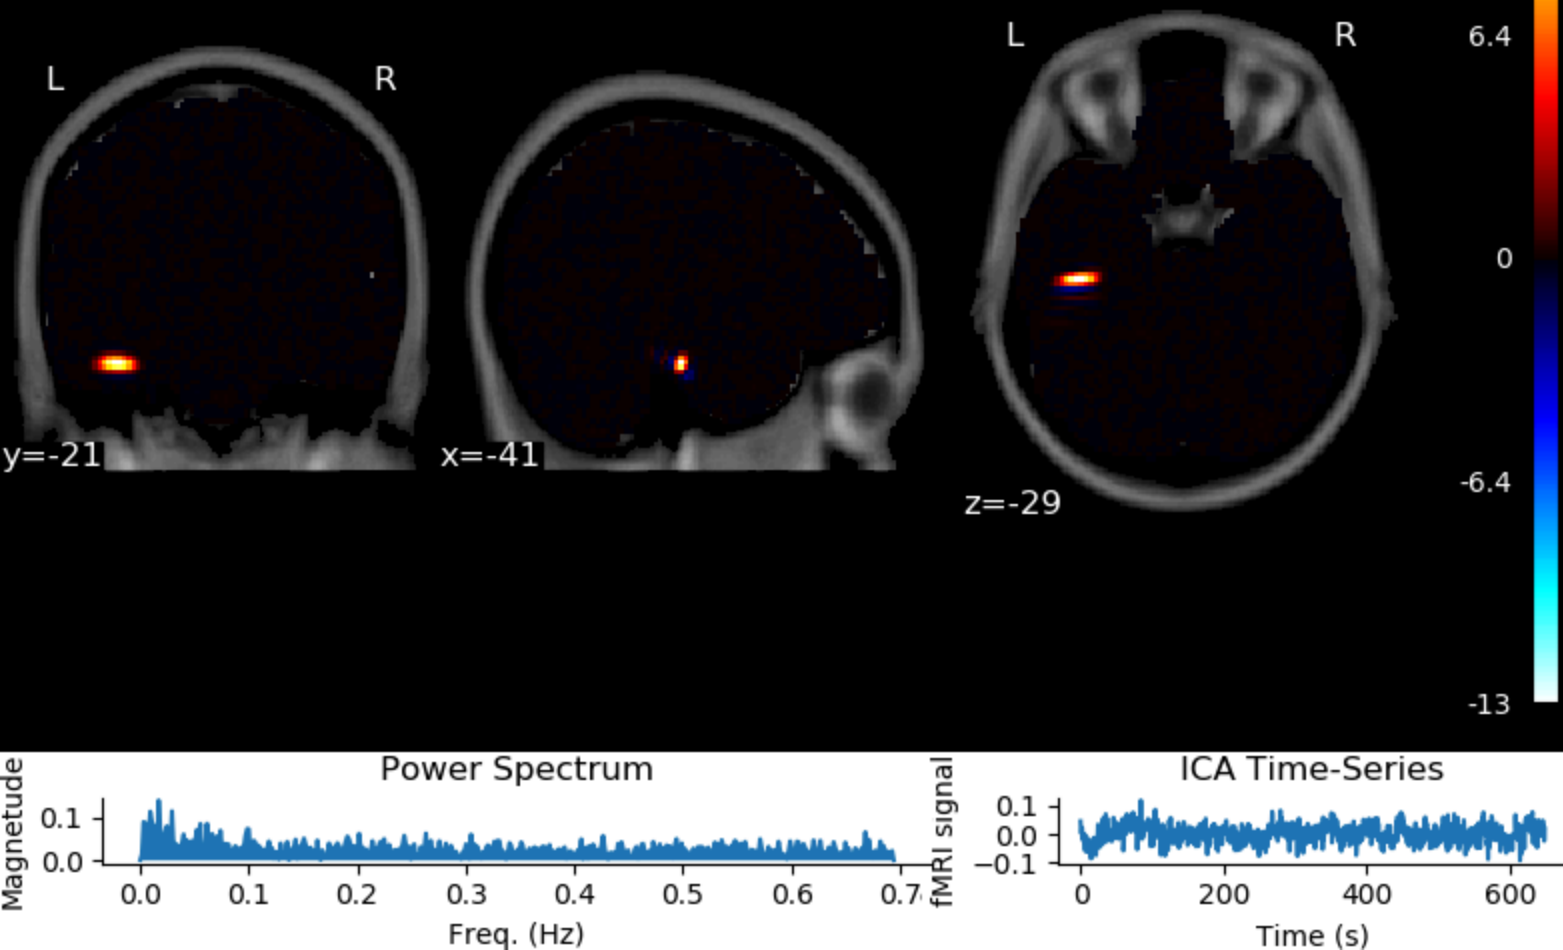

ICA200,134

ICA component: HCP-mean\_component\_ica\_s\_all\_134

ICN template: ...Noise\_artifact

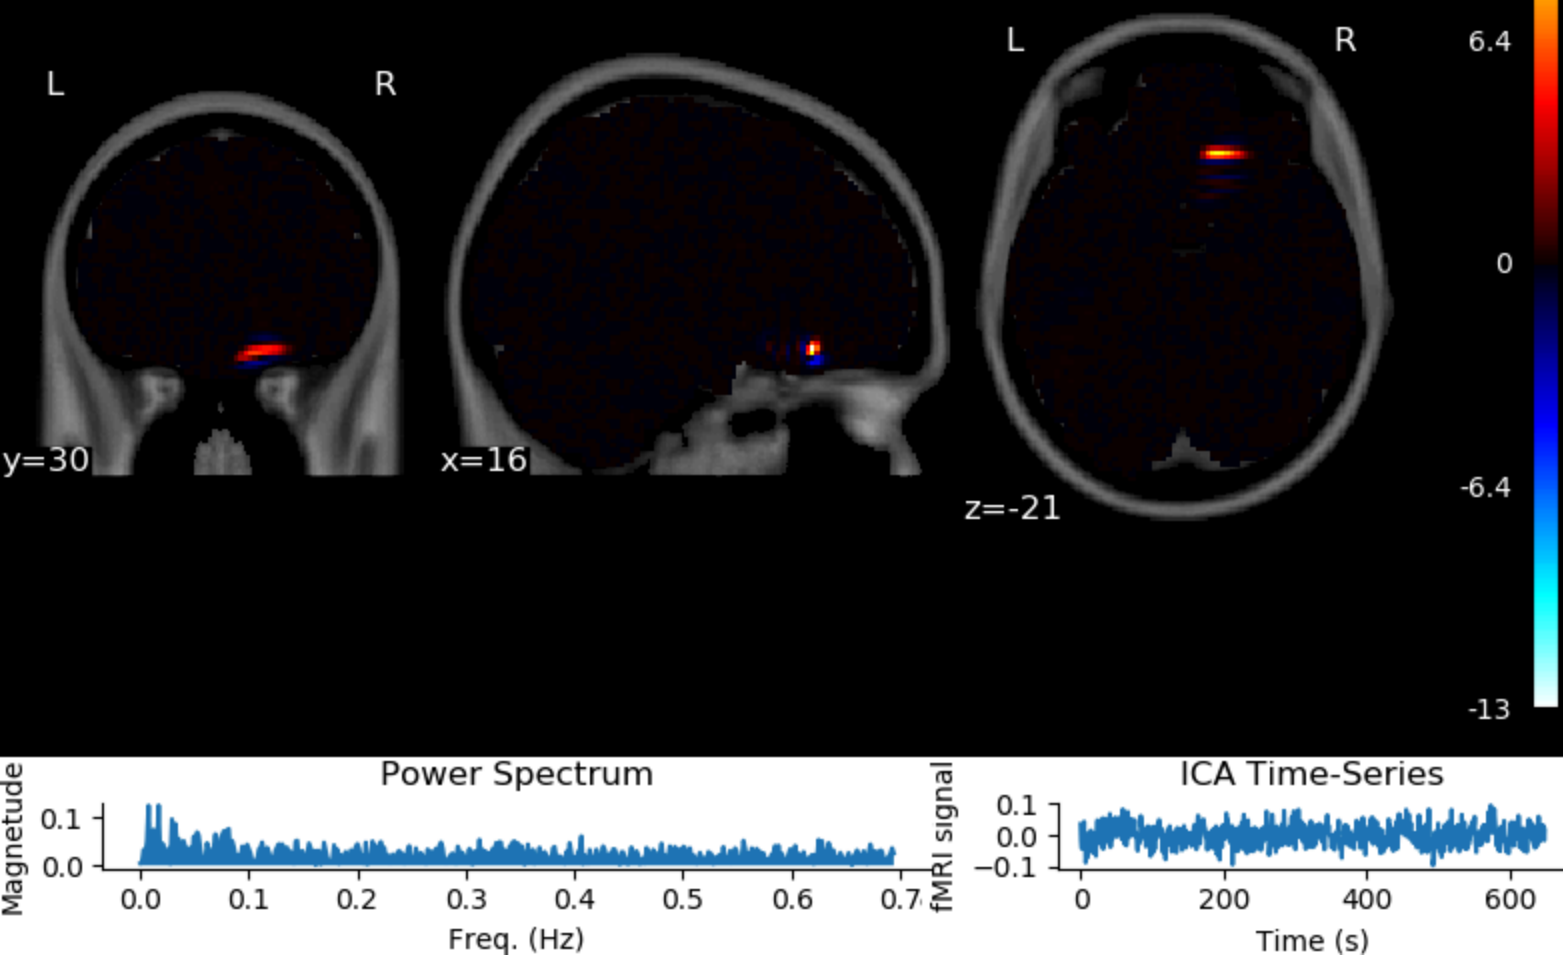

ICA200,135

ICA component: HCP-mean\_component\_ica\_s\_all\_135

ICN template: ...Noise\_artifact

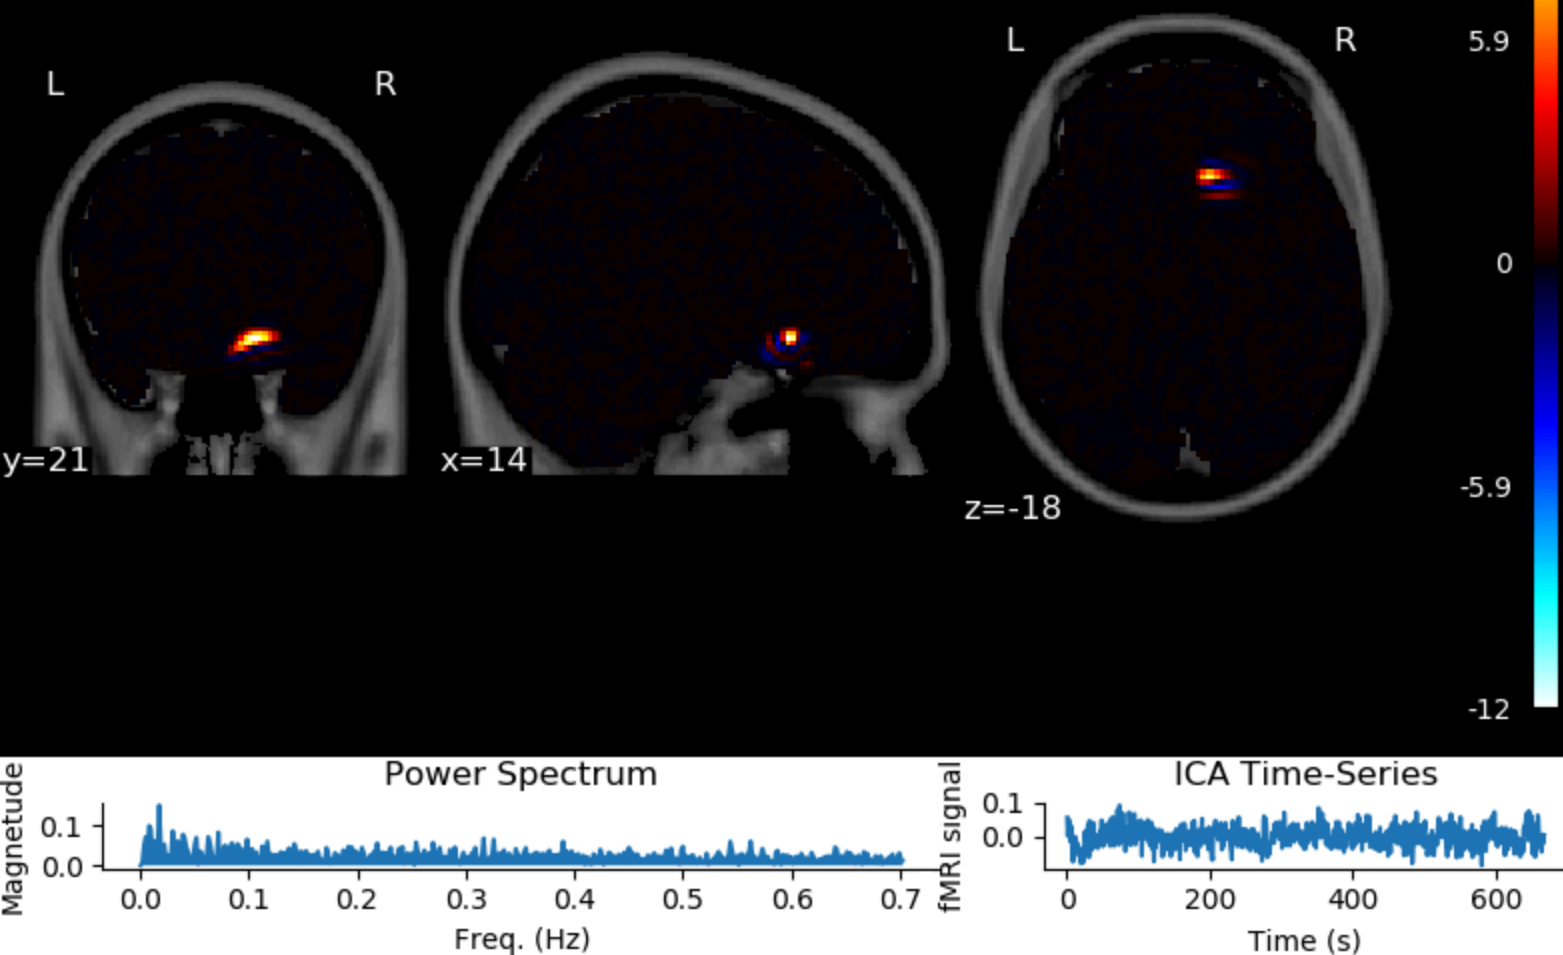

ICA200,139

ICA component: HCP-mean\_component\_ica\_s\_all\_139

ICN template: ...Noise\_artifact

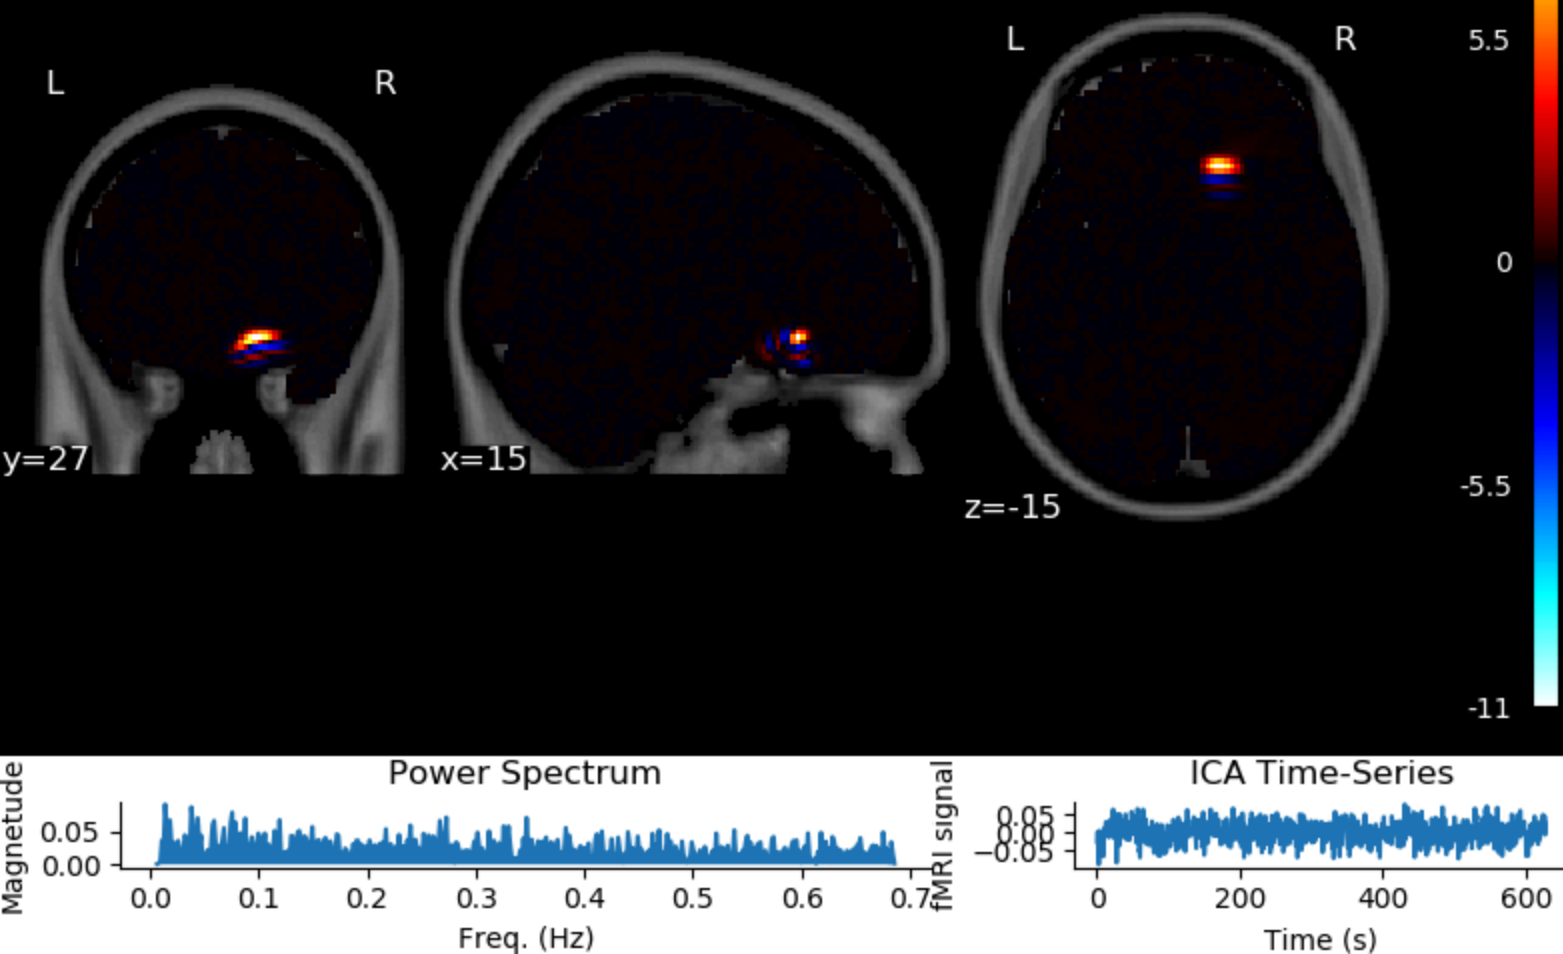

ICA200,140

ICA component: HCP-mean\_component\_ica\_s\_all\_140

ICN template: ...Noise\_artifact

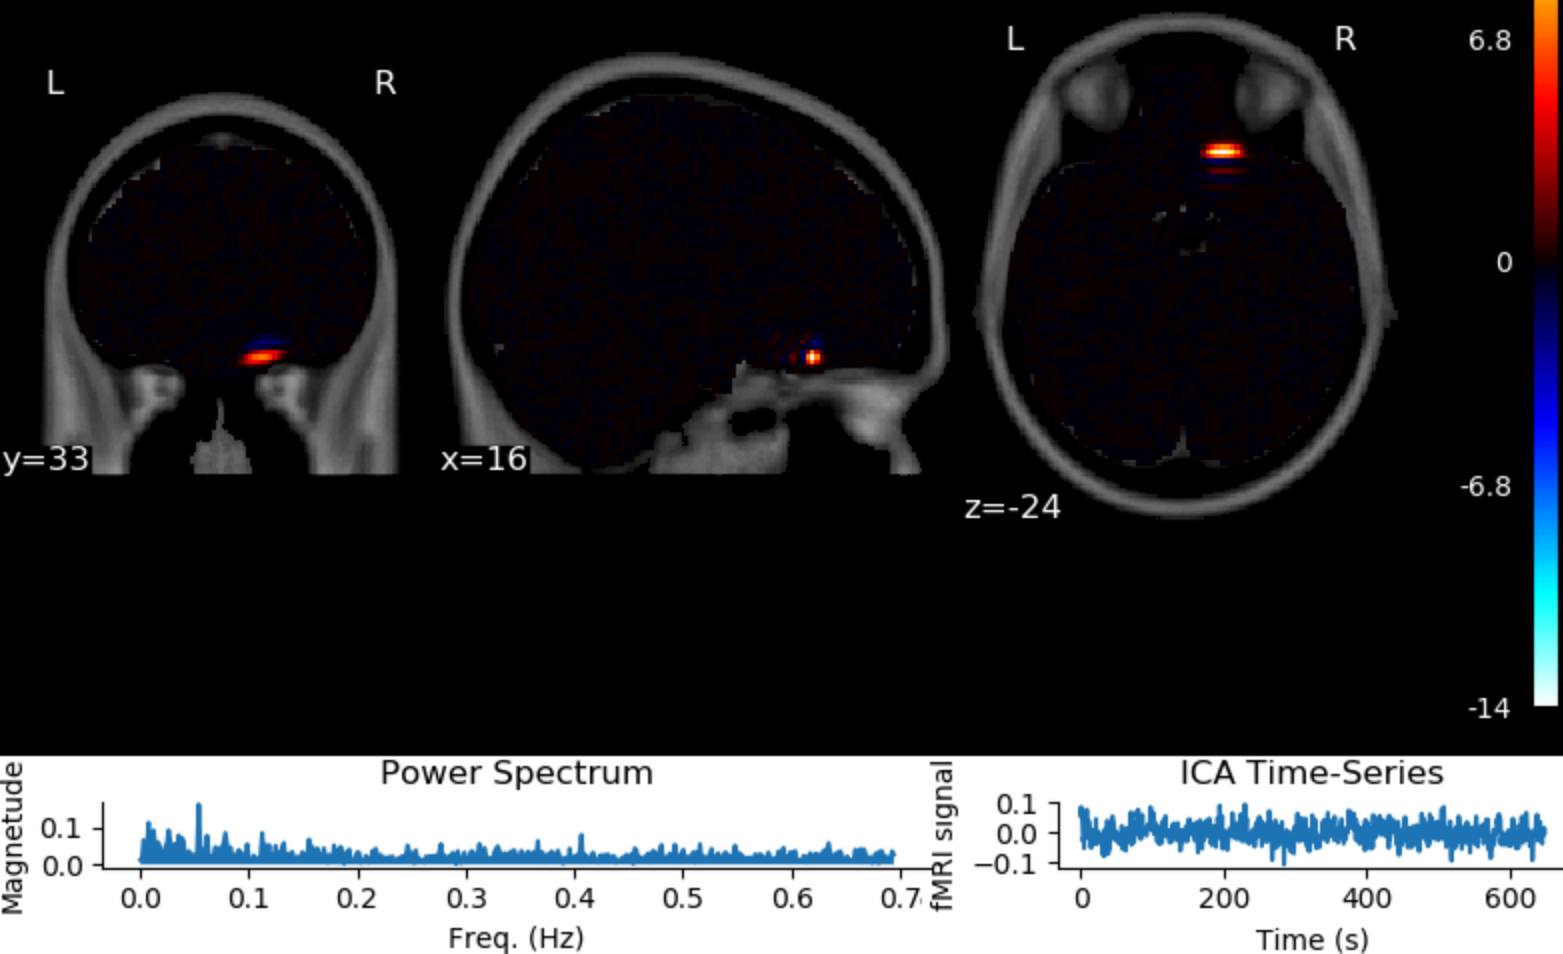

ICA200,146

ICA component: HCP-mean\_component\_ica\_s\_all\_146

ICN template: ...Noise\_artifact

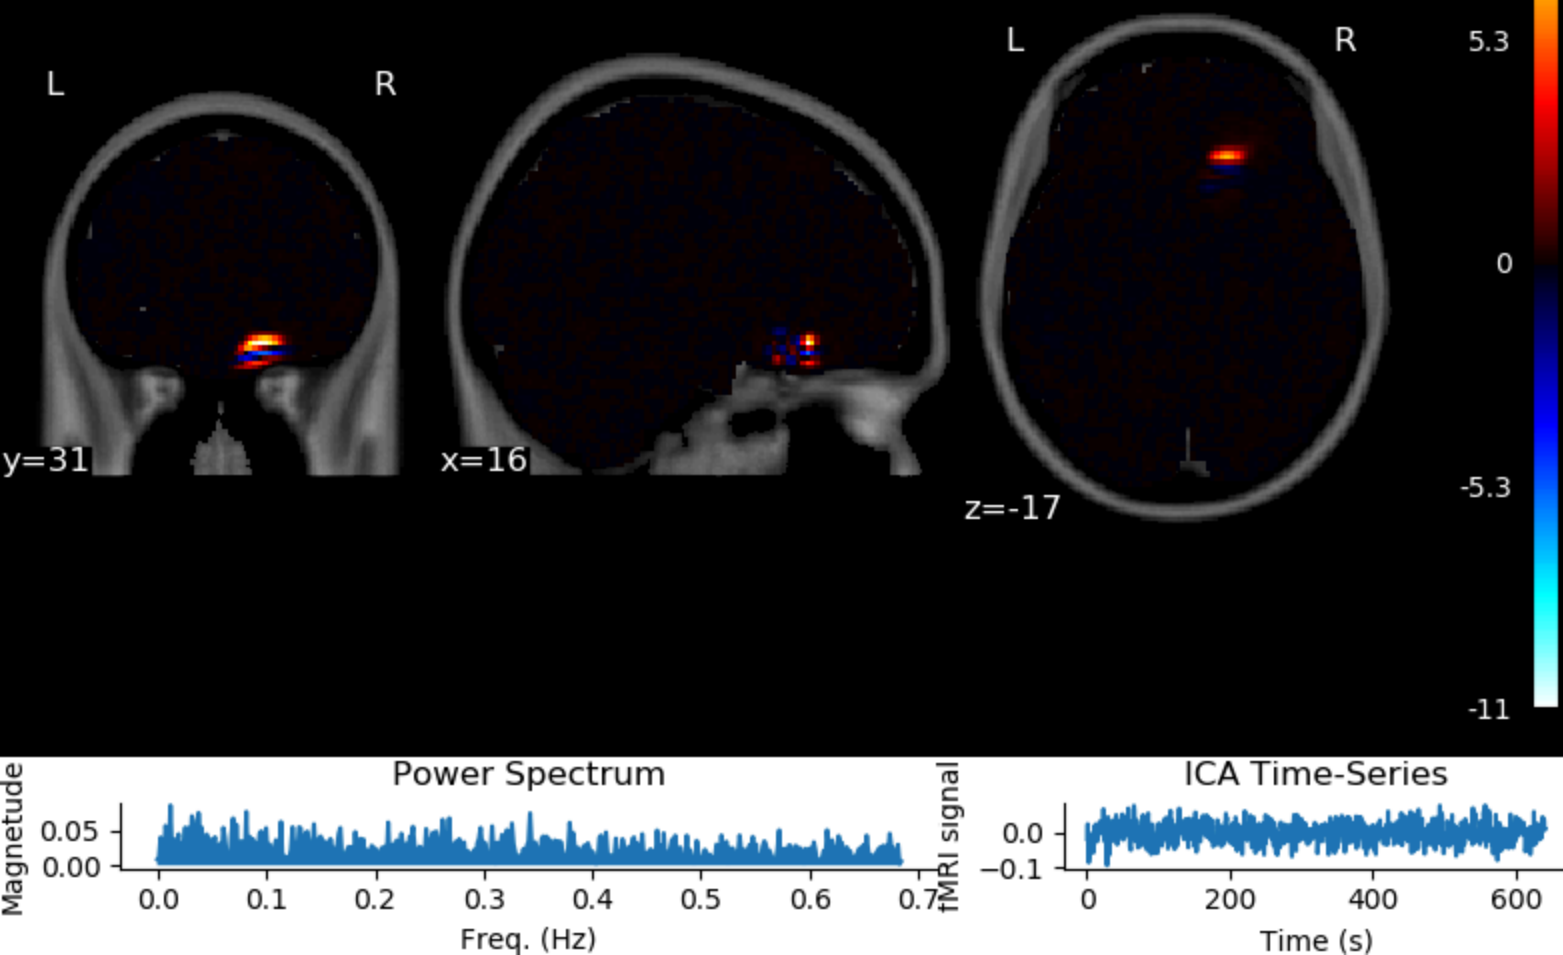

ICA200,148

ICA component: HCP-mean\_component\_ica\_s\_all\_148

ICN template: ...Noise\_artifact

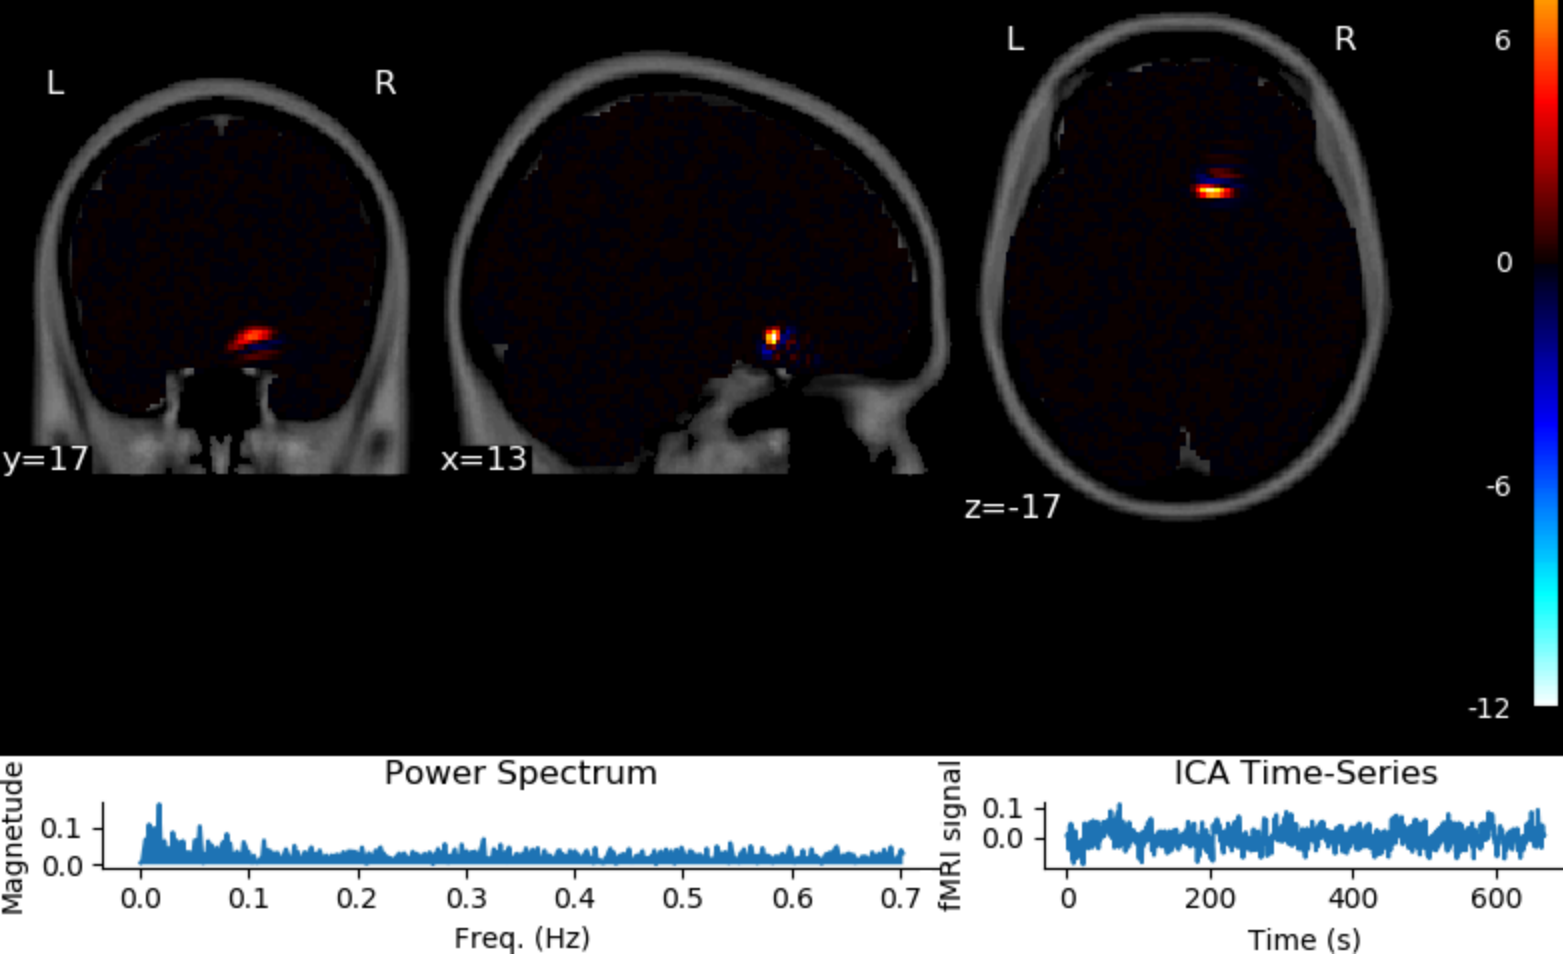



ICA200,151

ICA component: HCP-mean\_component\_ica\_s\_all\_151

ICN template: ...Noise\_artifact

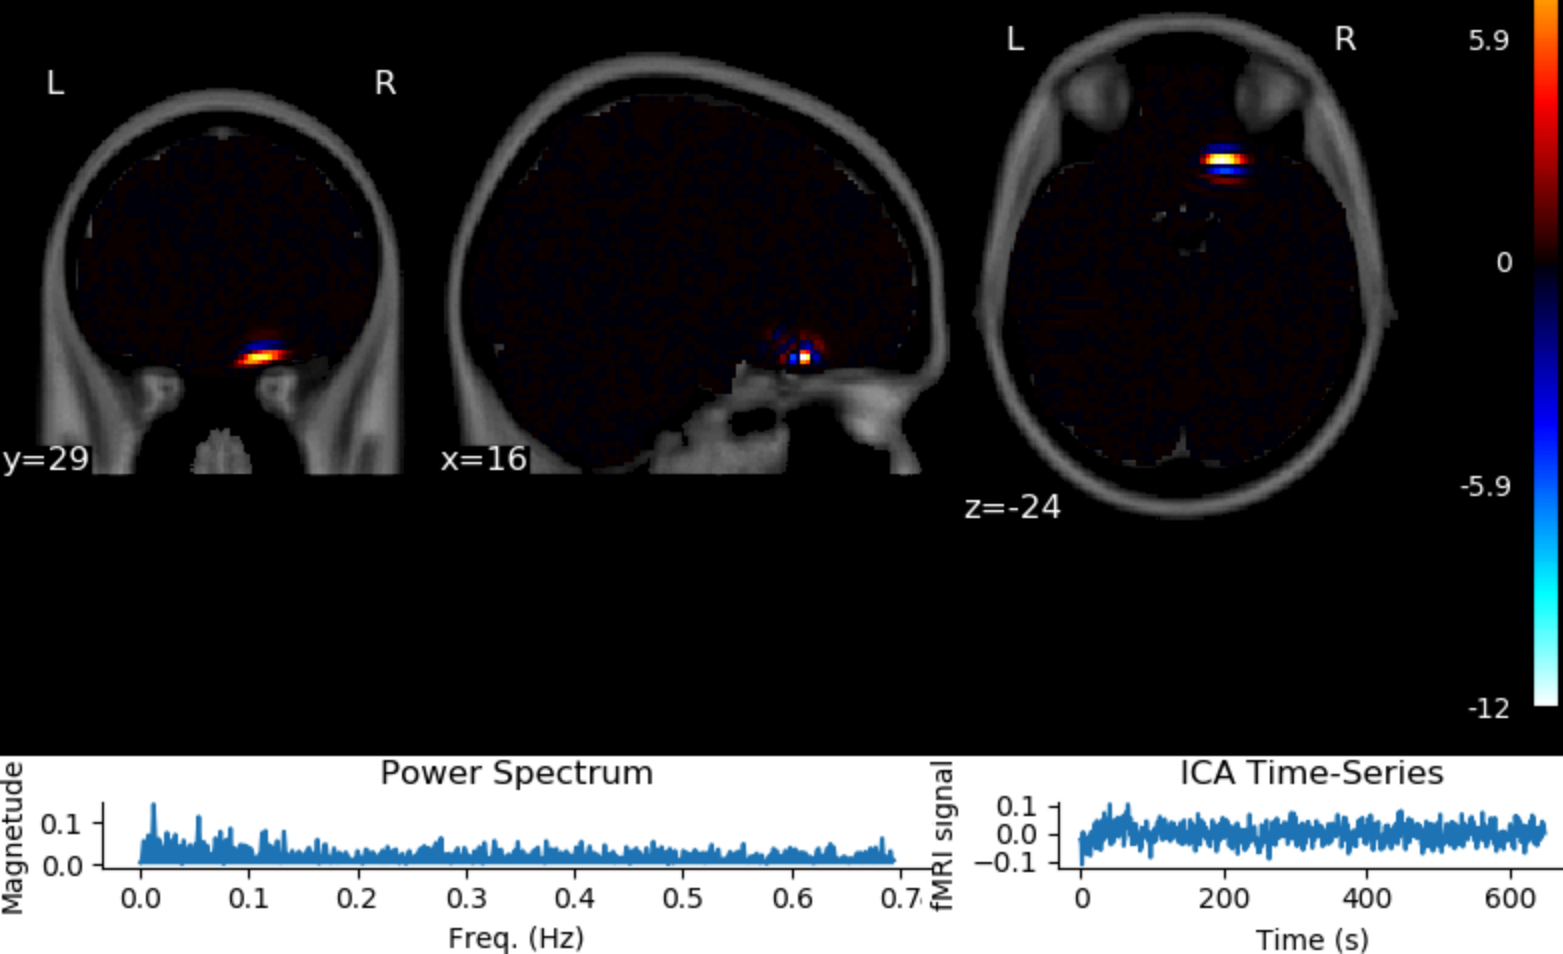

ICA200,152

ICA component: HCP-mean\_component\_ica\_s\_all\_152

ICN template: ...Noise\_artifact

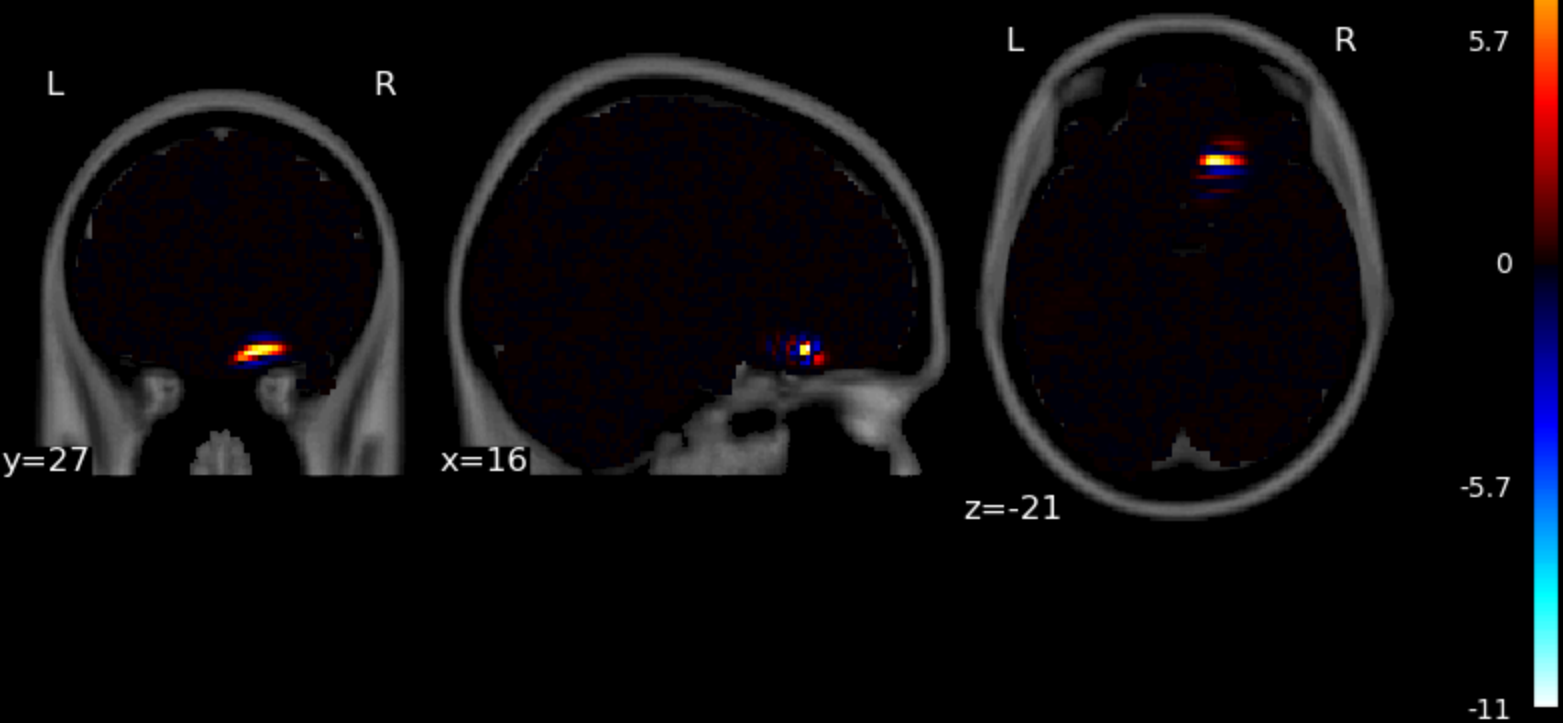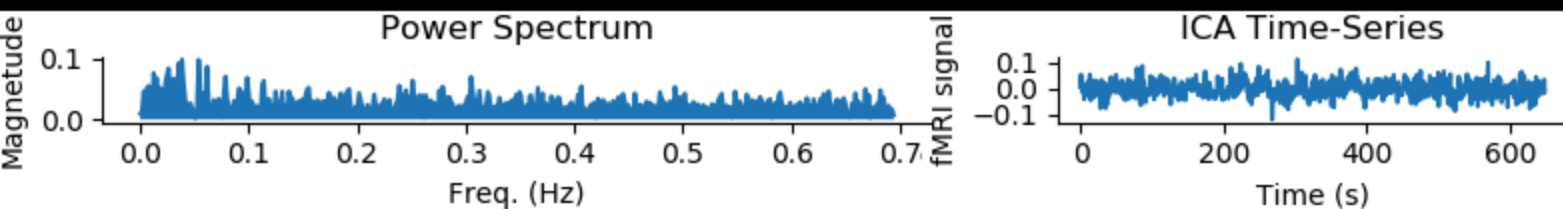

ICA200,155

ICA component: HCP-mean\_component\_ica\_s\_all\_155

ICN template: ...Noise\_artifact

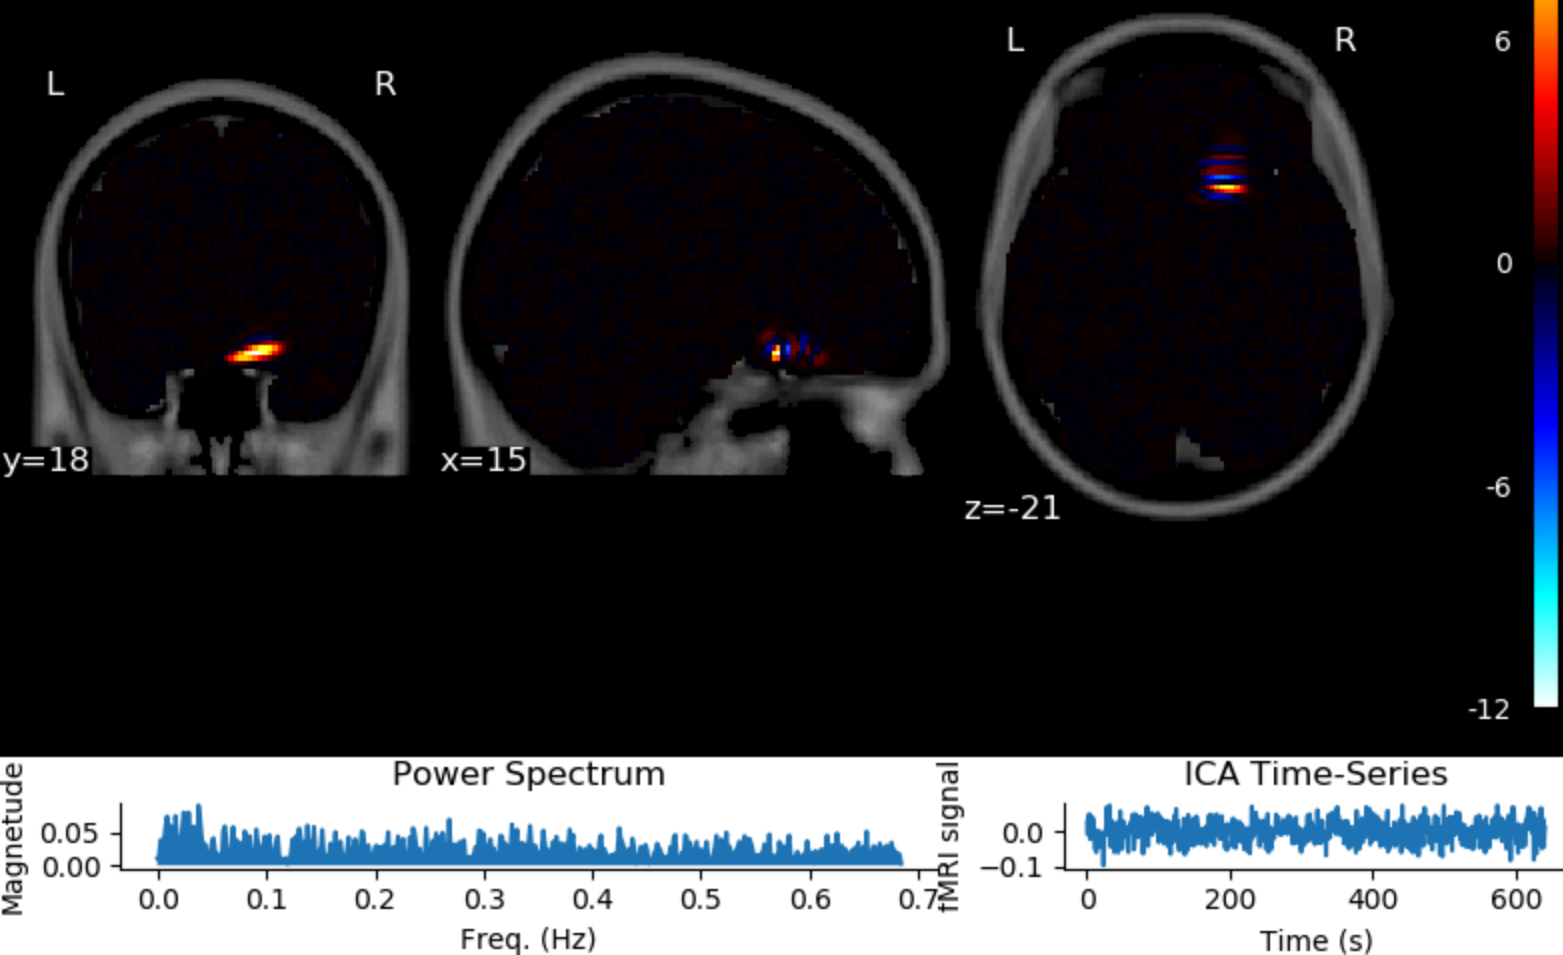

ICA200,157

ICA component: HCP-mean\_component\_ica\_s\_all\_157

ICN template: ...Noise\_artifact

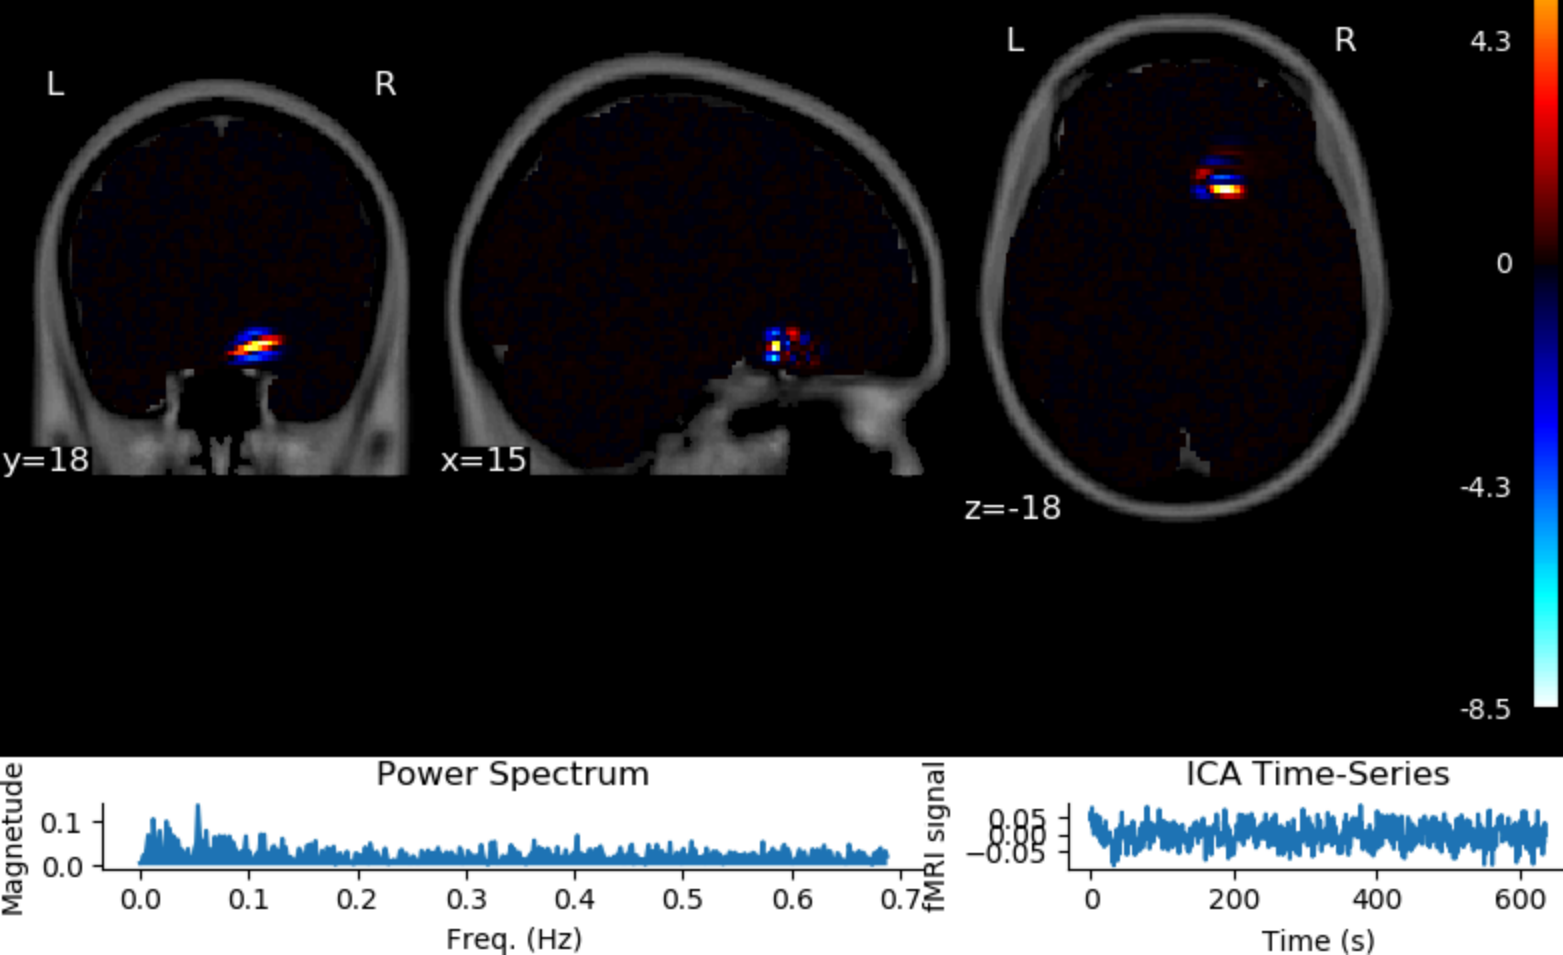

ICA200,158

ICA component: HCP-mean\_component\_ica\_s\_all\_158

ICN template: ...Noise\_artifact

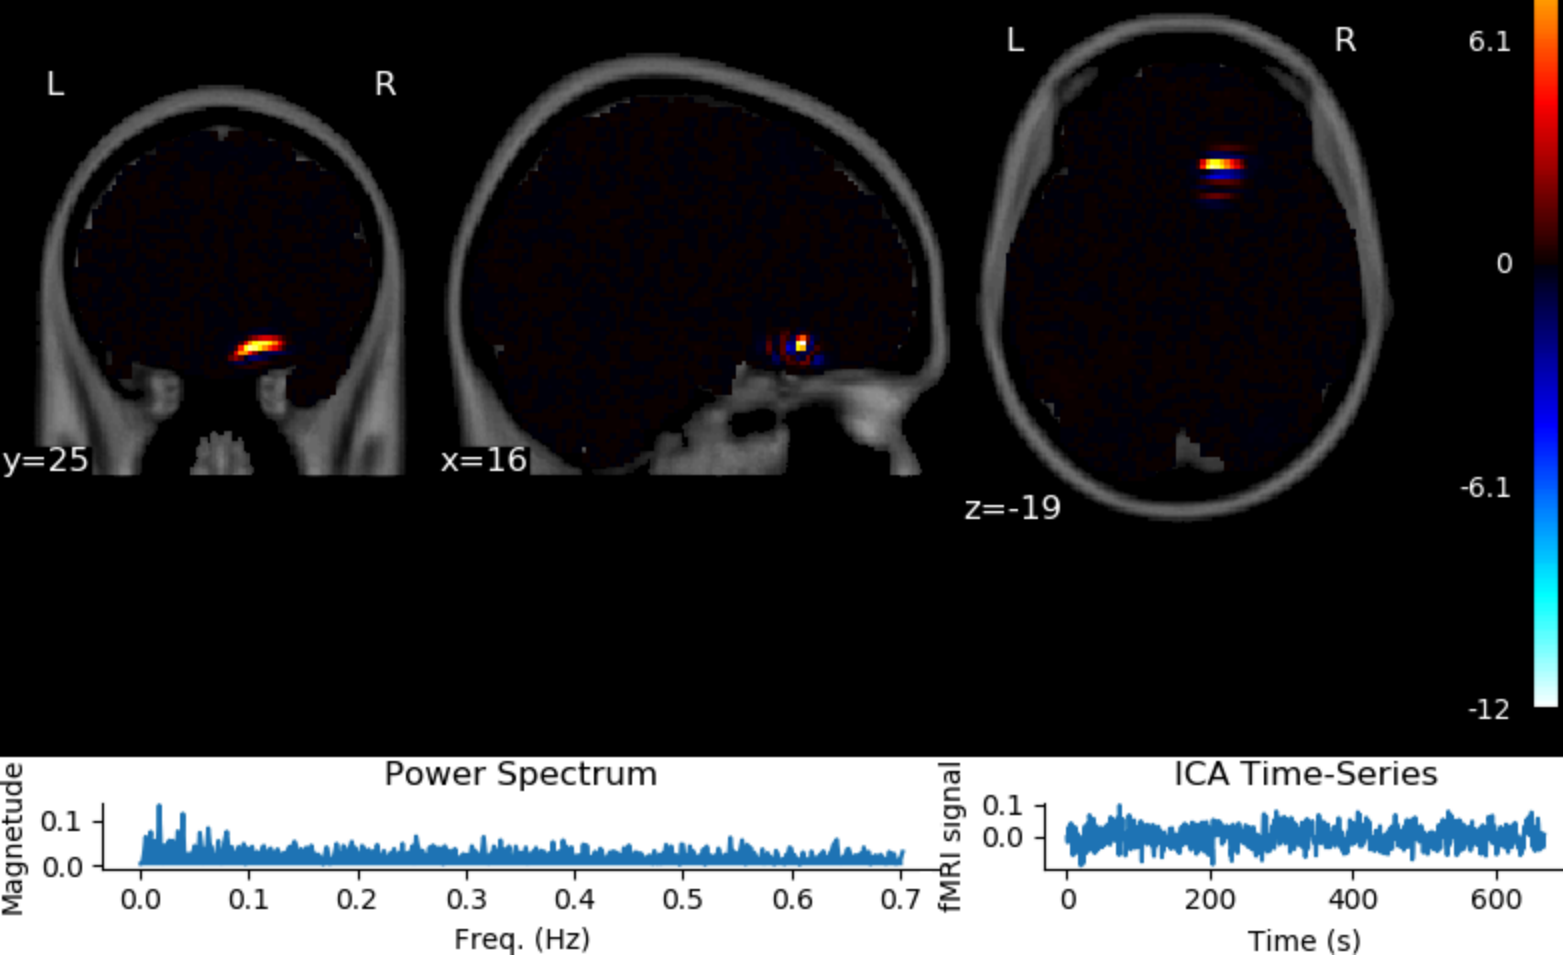

ICA200,162

ICA component: HCP-mean\_component\_ica\_s\_all\_162

ICN template: ...Noise\_artifact

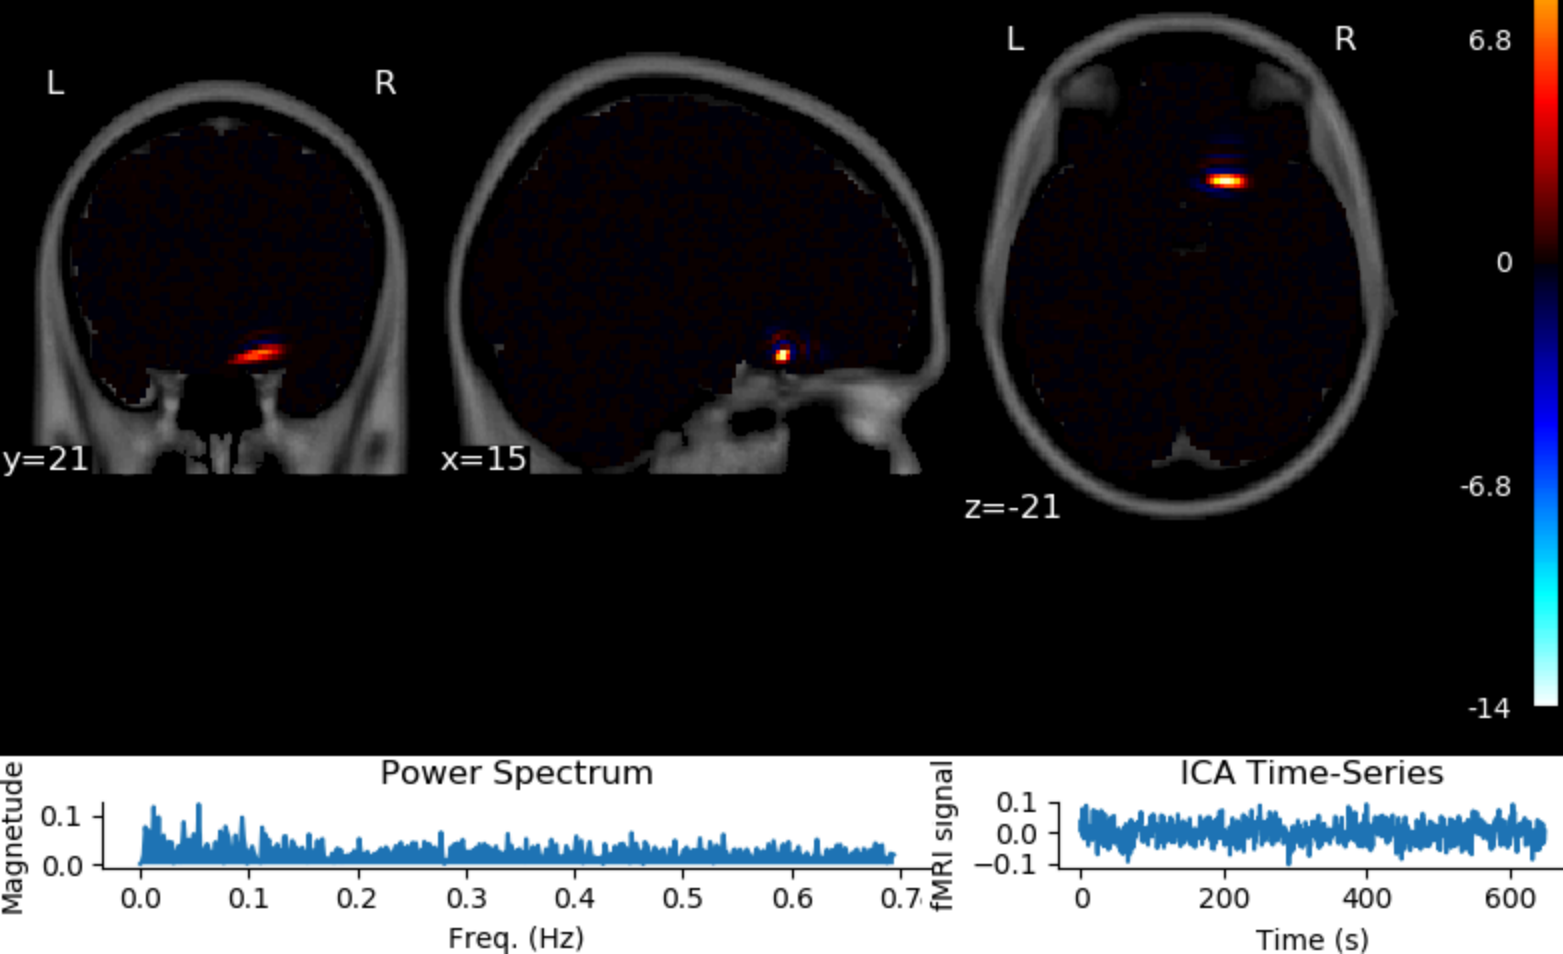

ICA200,163

ICA component: HCP-mean\_component\_ica\_s\_all\_163

ICN template: ...Noise\_artifact

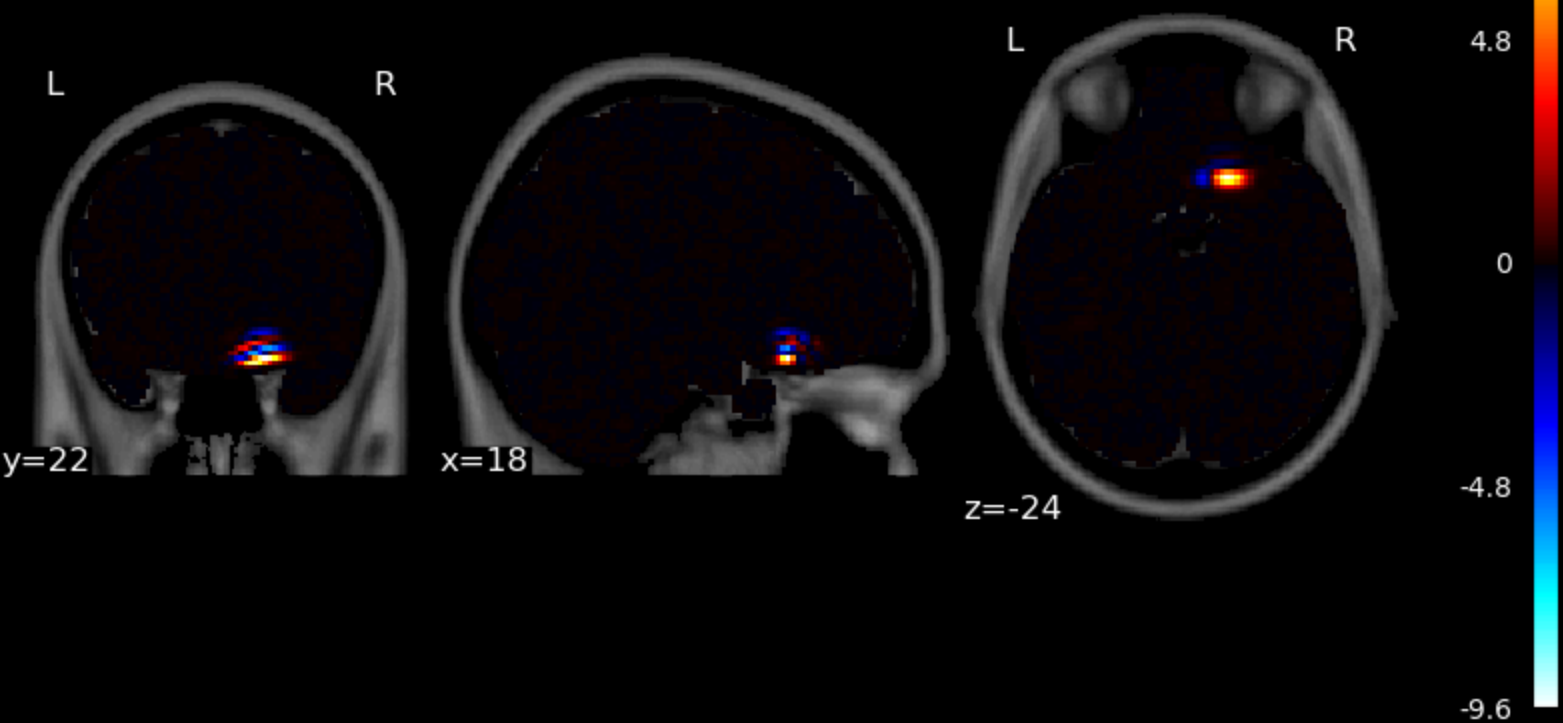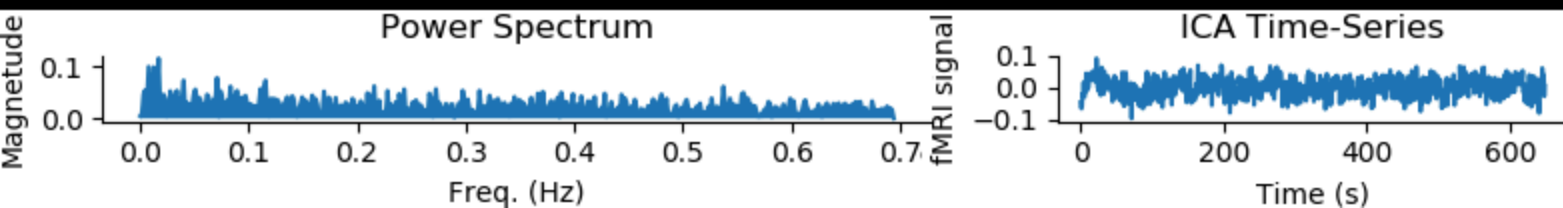

ICA200,165

ICA component: HCP\_mean\_component\_ica\_s\_all\_165

ICN template: ...Noise\_artifact

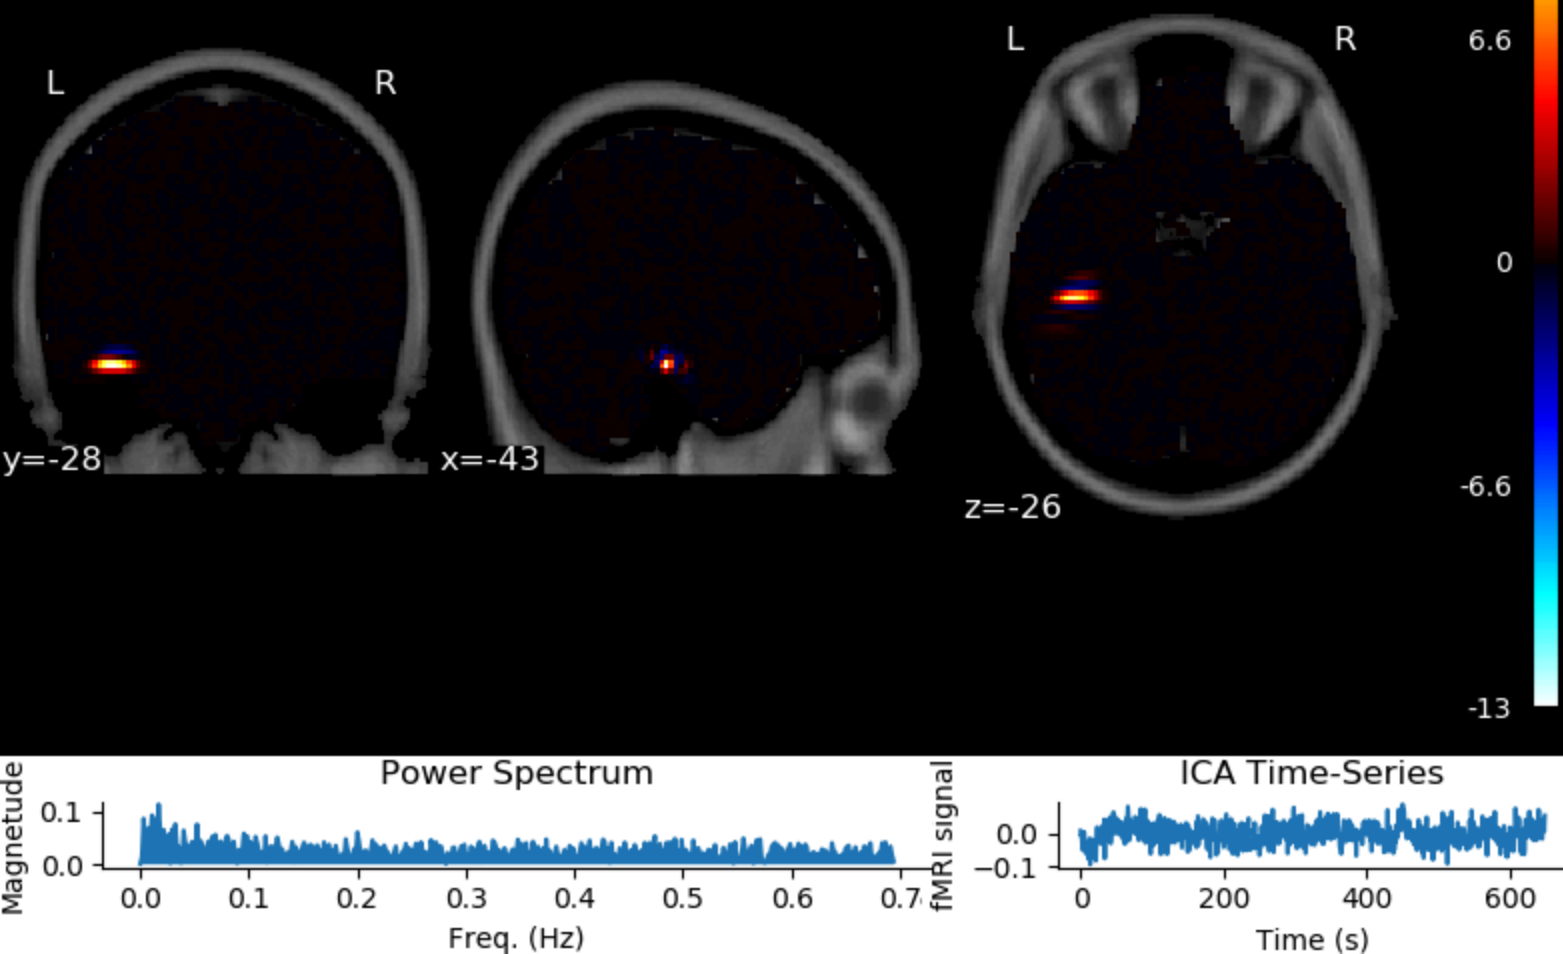



ICA200,168

ICA component: HCP-mean\_component\_ica\_s\_all\_168

ICN template: ...Noise\_artifact

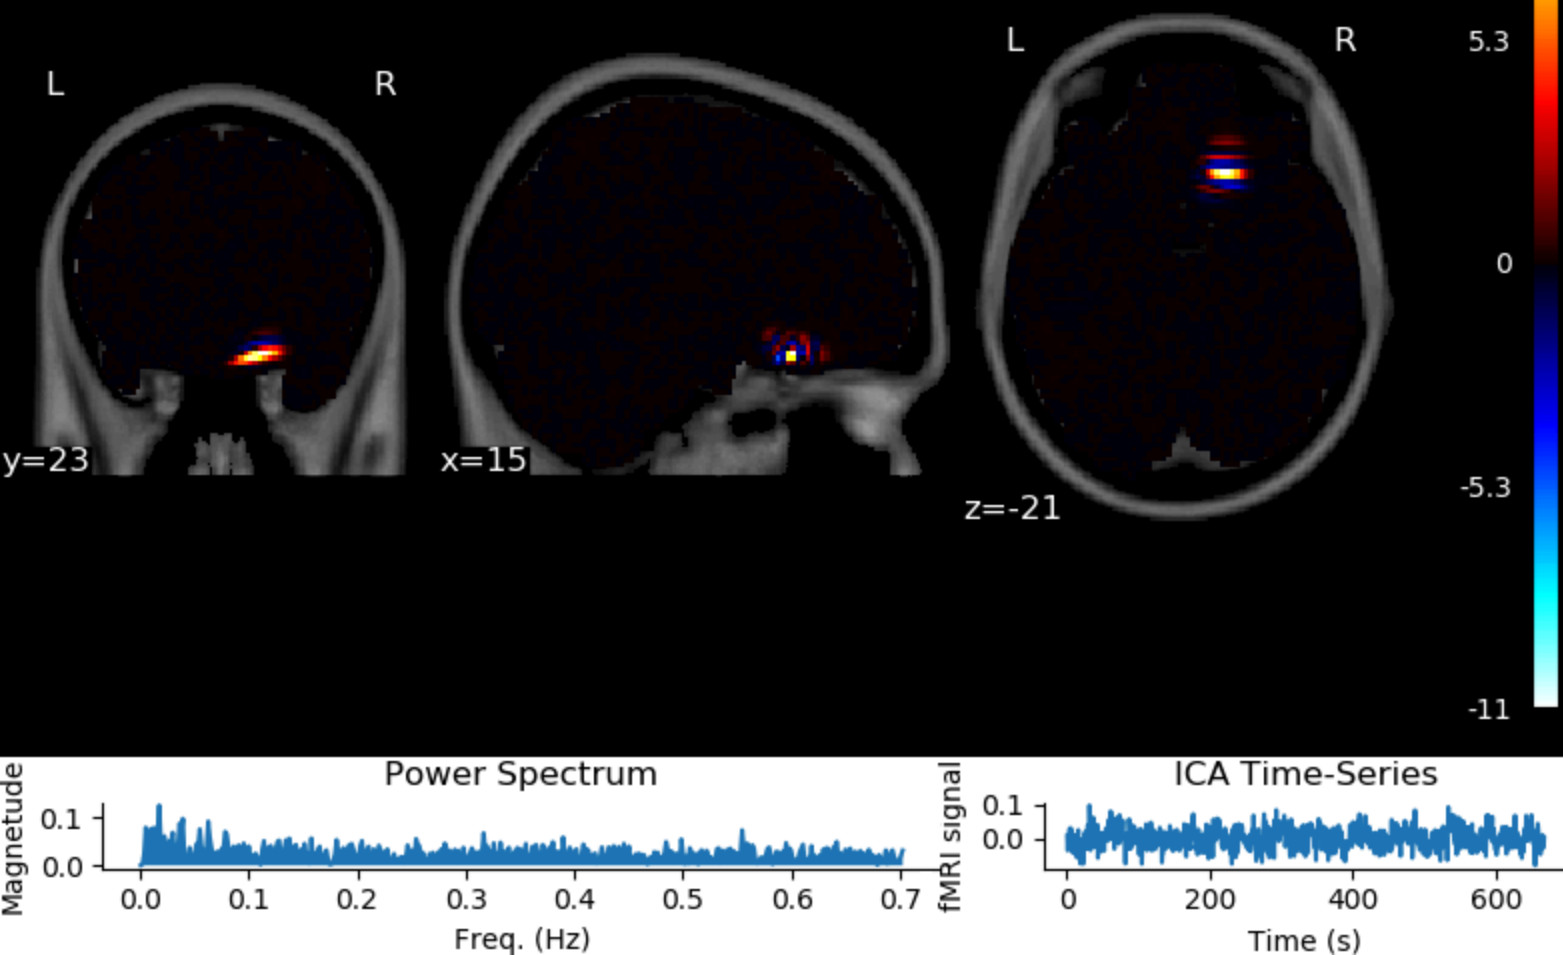

ICA200,169

ICA component: HCP-mean\_component\_ica\_s\_all\_169

ICN template: ...Noise\_artifact

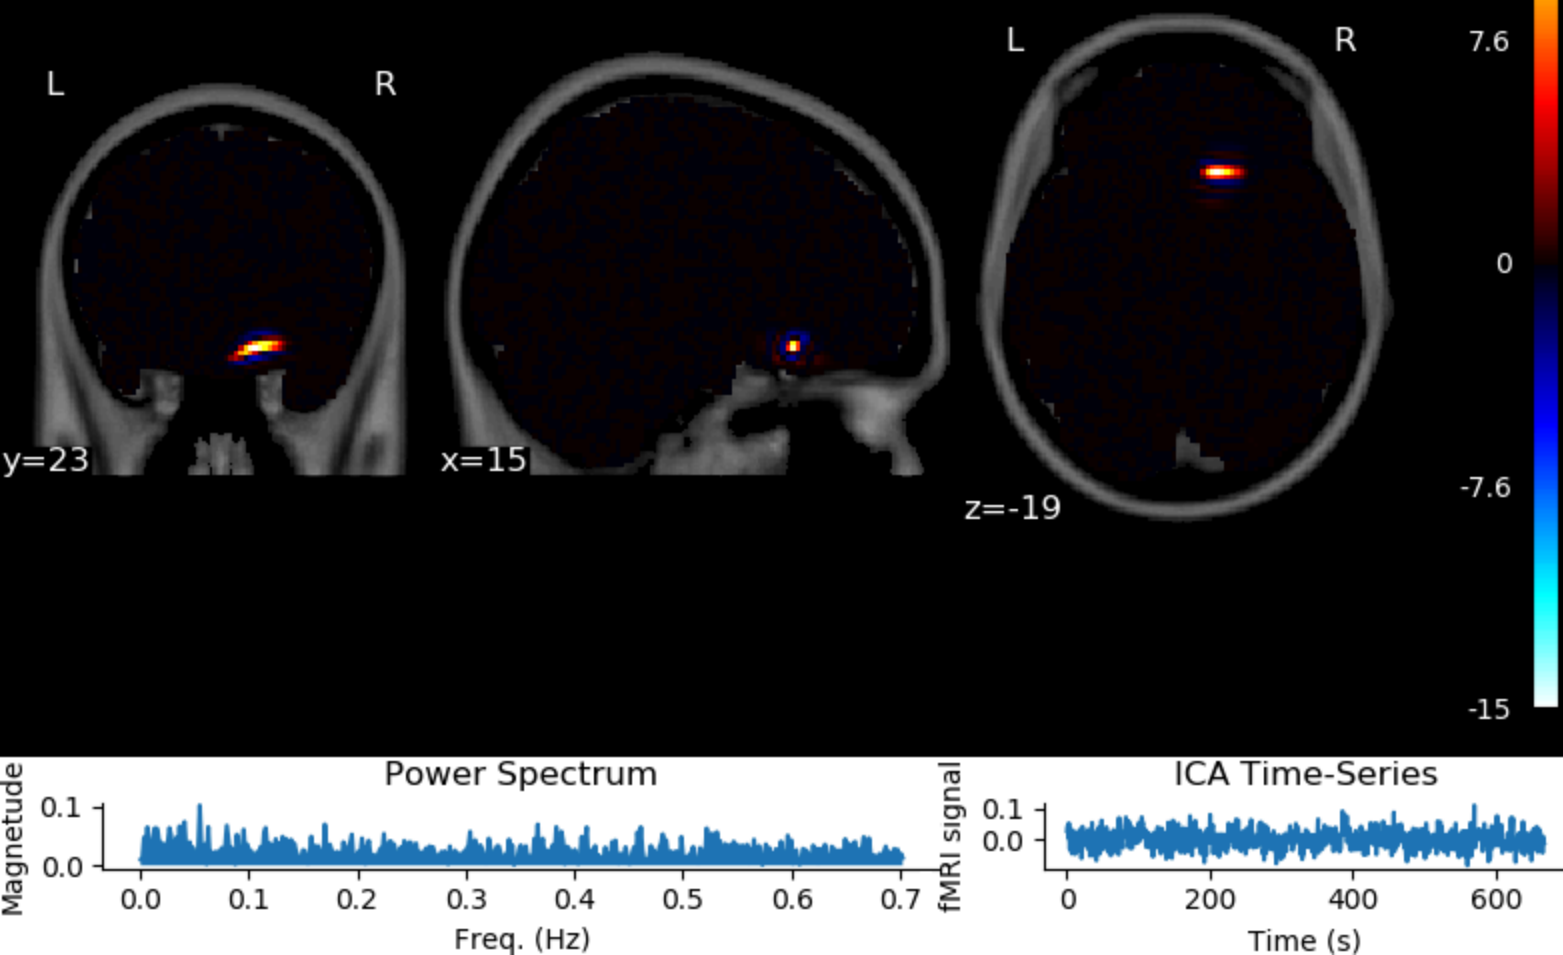

ICA200,170

ICA component: HCP-mean\_component\_ica\_s\_all\_170

ICN template: ...Noise\_artifact

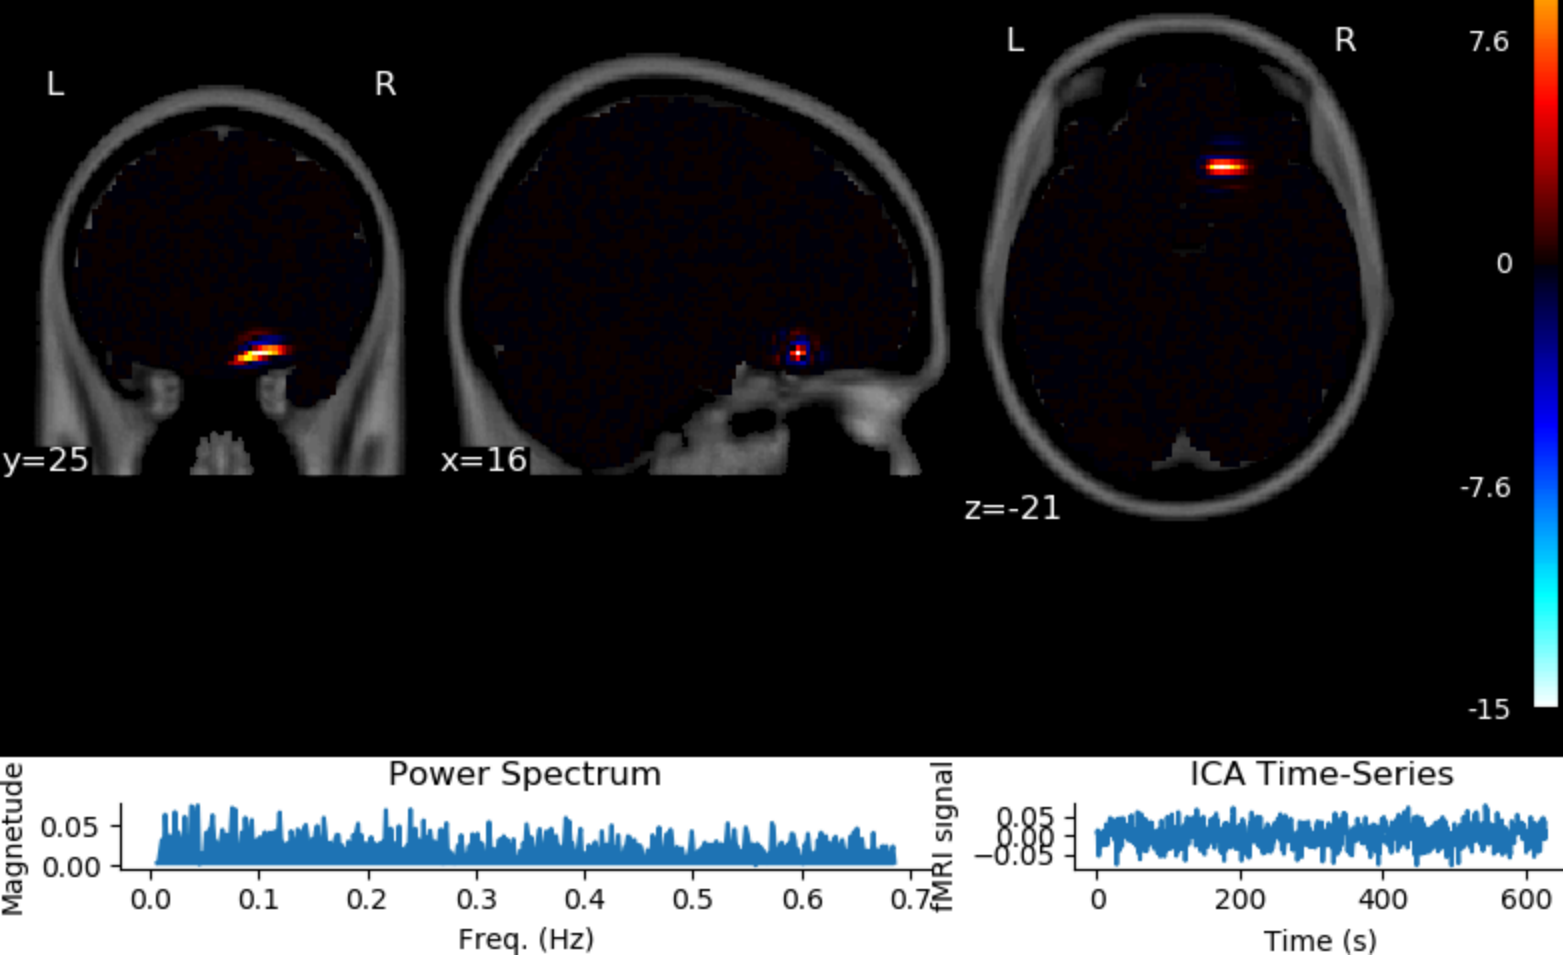

ICA200,171

ICA component: HCP\_mean\_component\_ica\_s\_all\_171

ICN template: ...Noise\_artifact

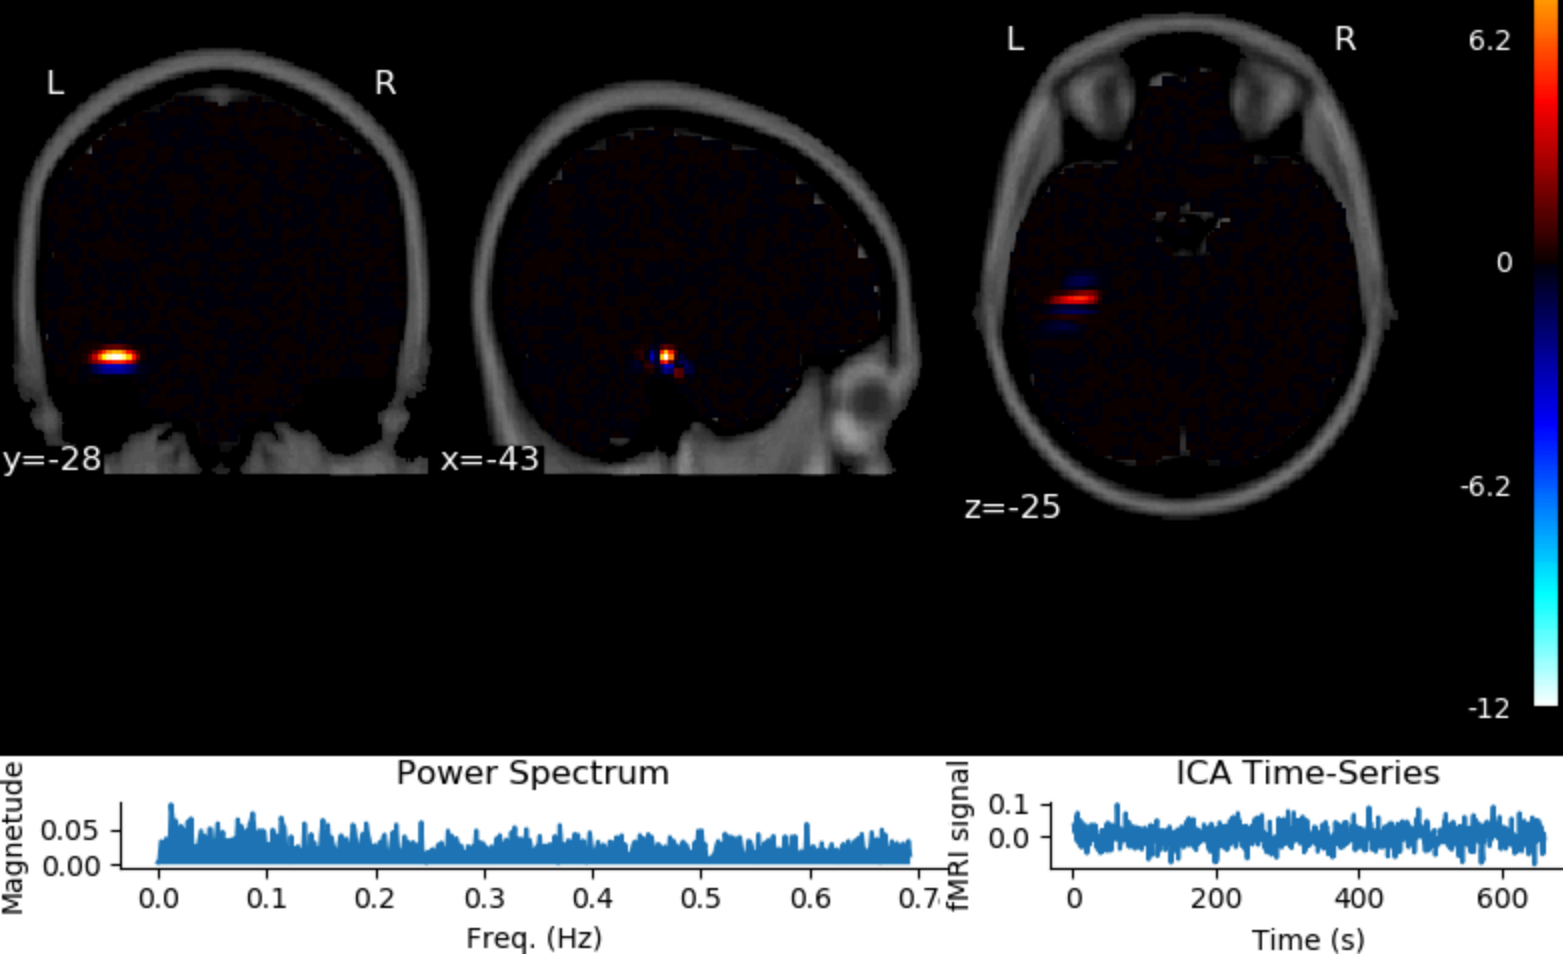

ICA200,179

ICA component: HCP-mean\_component\_ica\_s\_all\_179

ICN template: ...Noise\_artifact

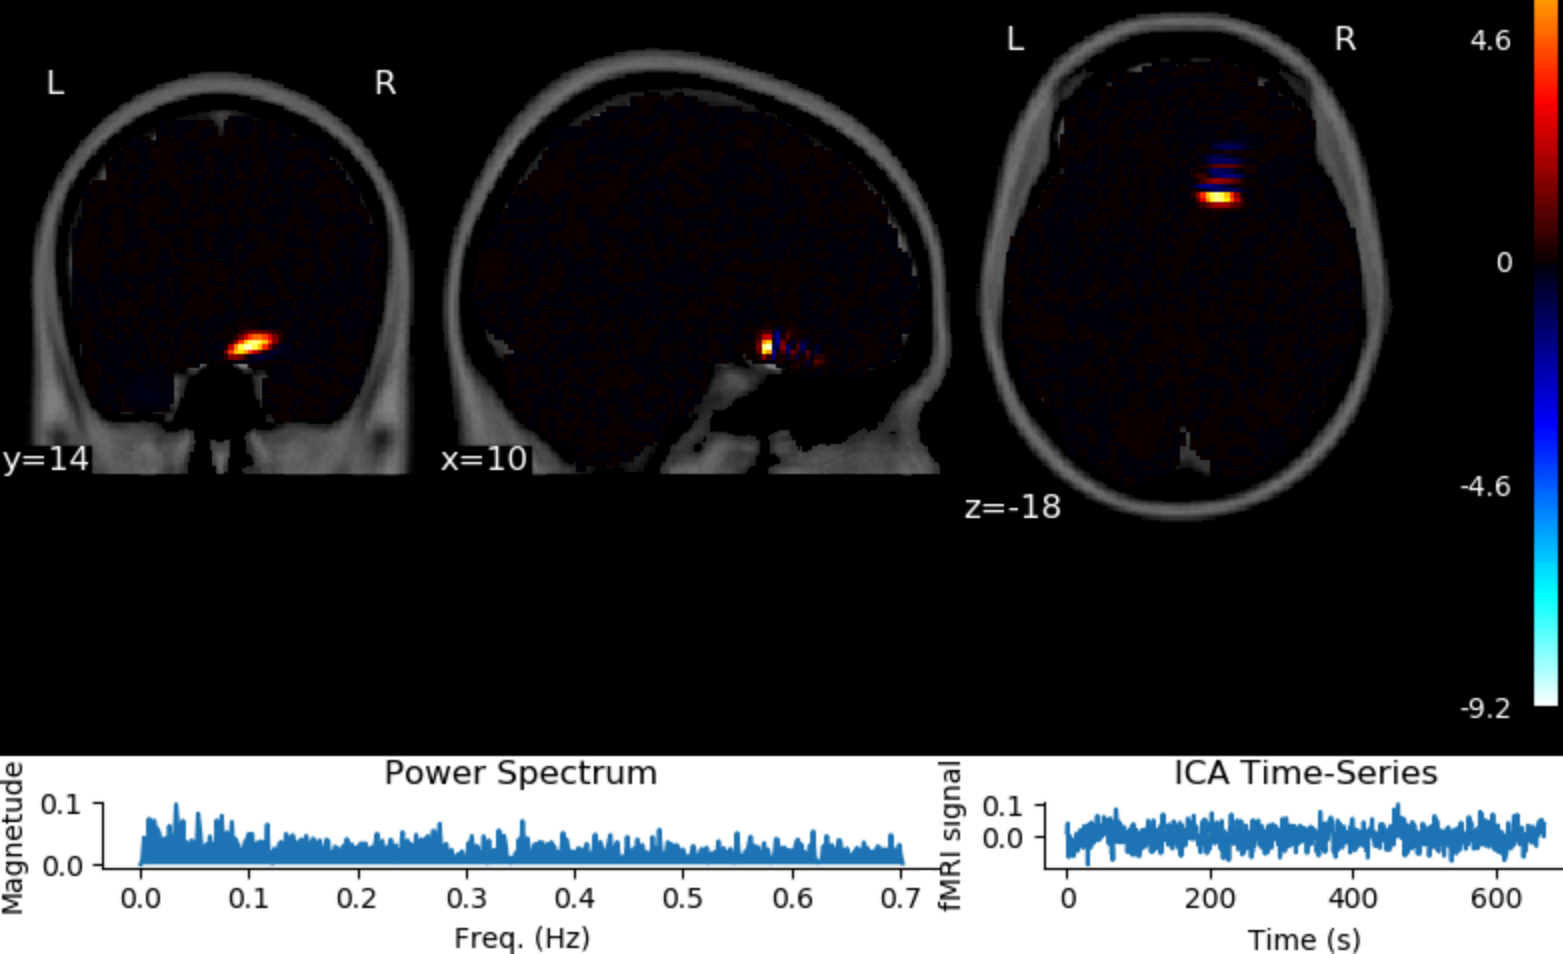

ICA200,180

ICA component: HCP\_mean\_component\_ica\_s\_all\_180

ICN template: ...Noise\_artifact

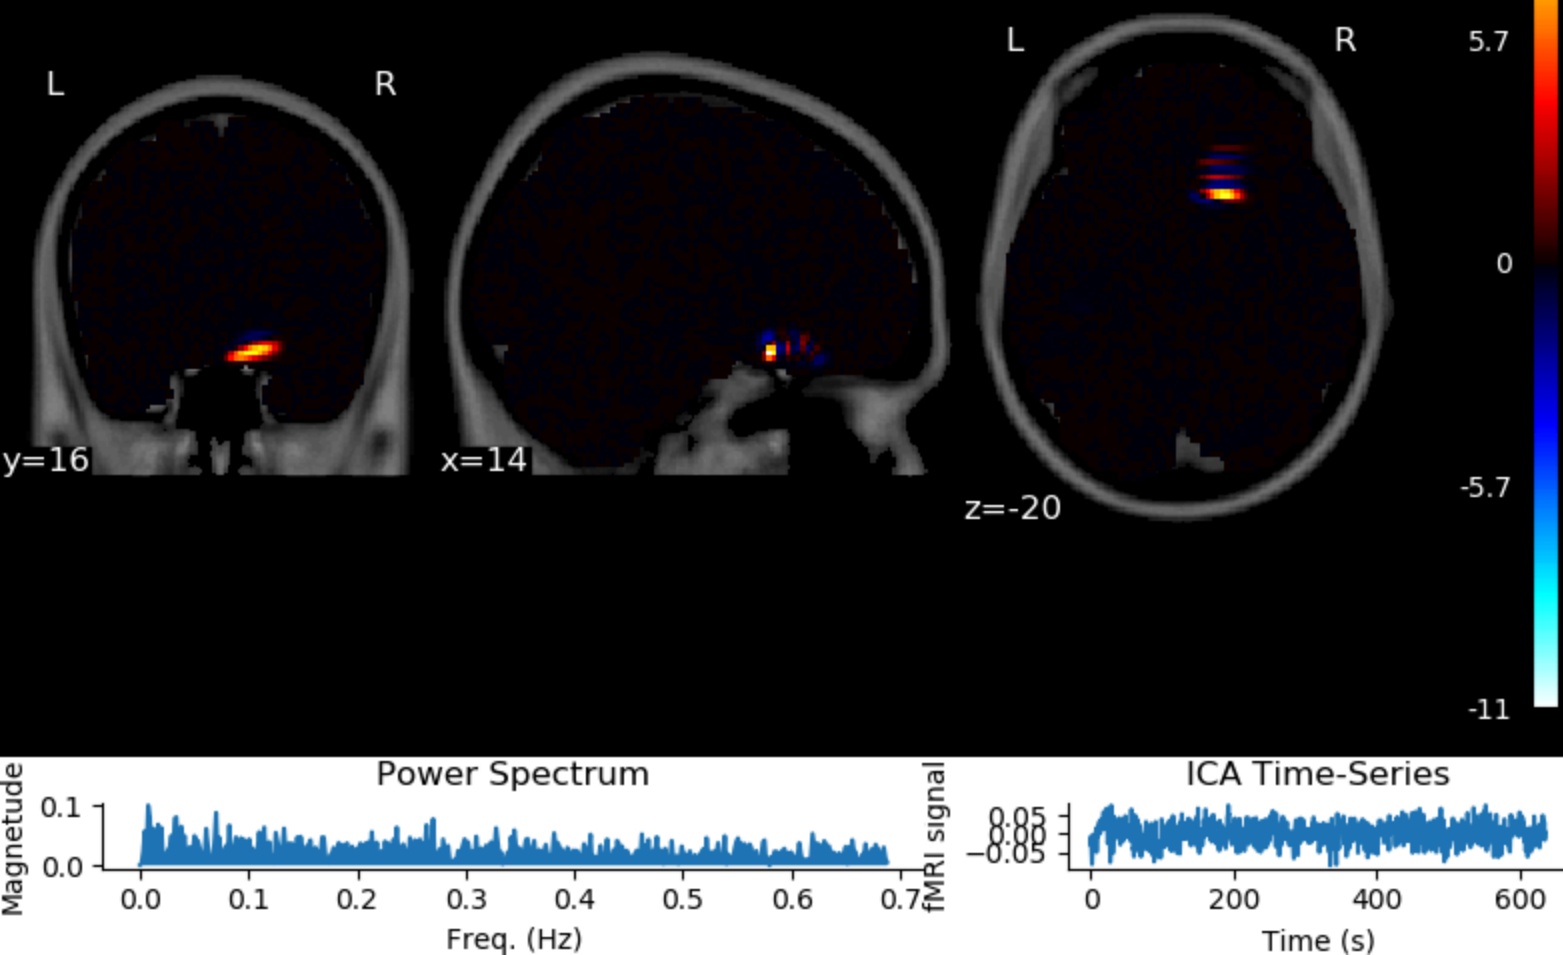

ICA200,190

ICA component: HCP-mean\_component\_ica\_s\_all\_190

ICN template: ...Noise\_artifact

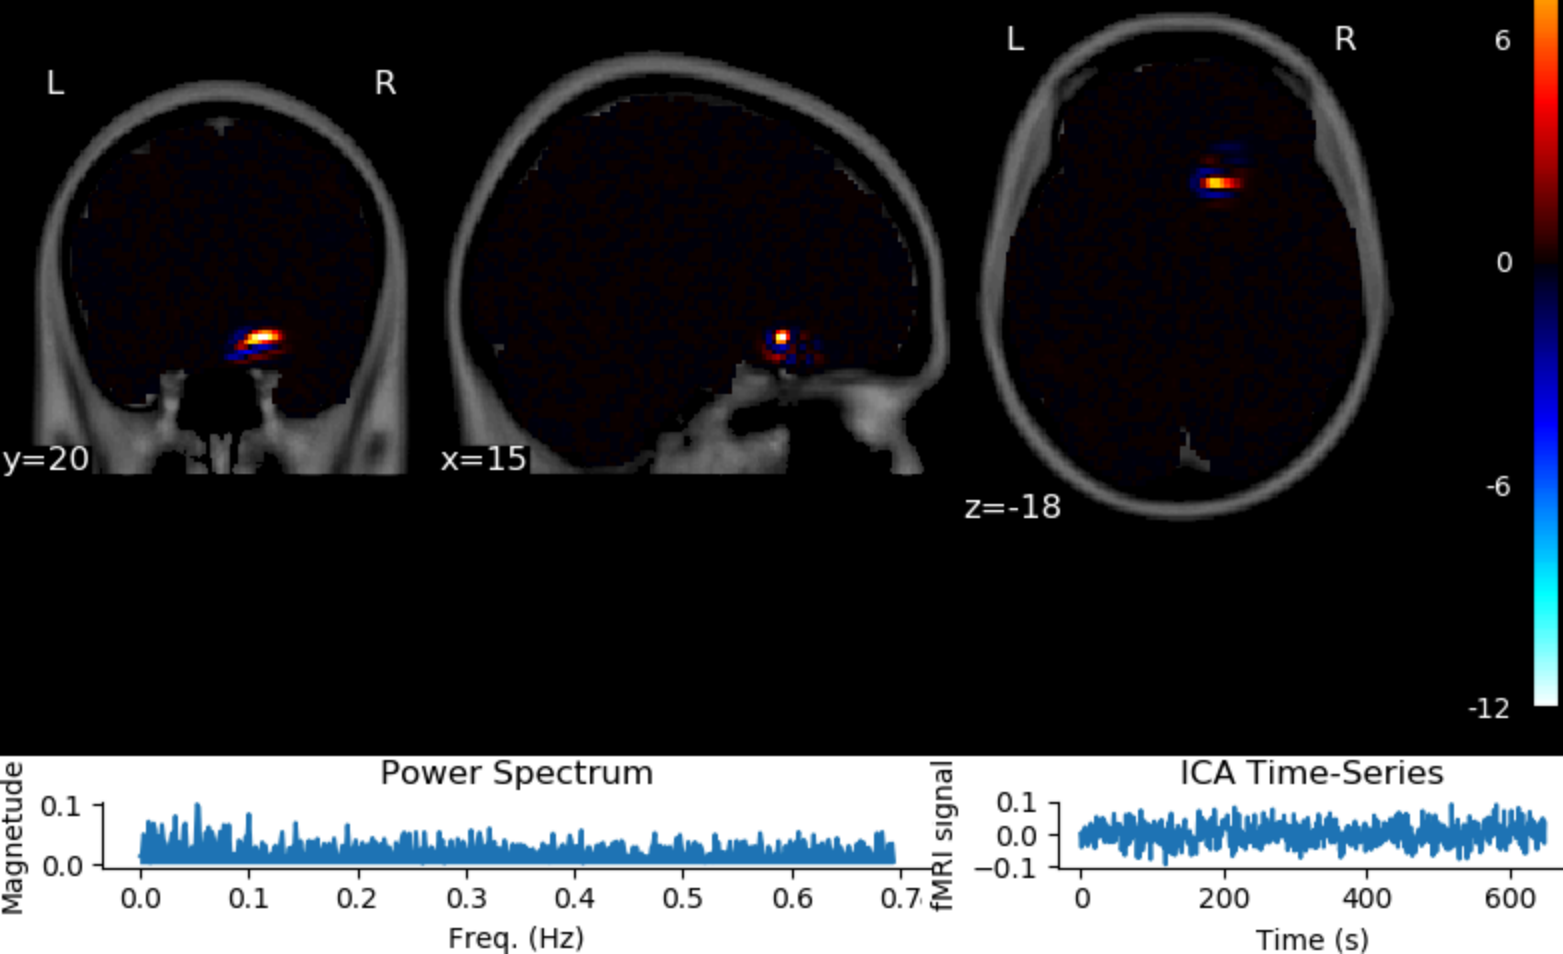

ICA200,191

ICA component: HCP-mean\_component\_ica\_s\_all\_191

ICN template: ...Noise\_artifact

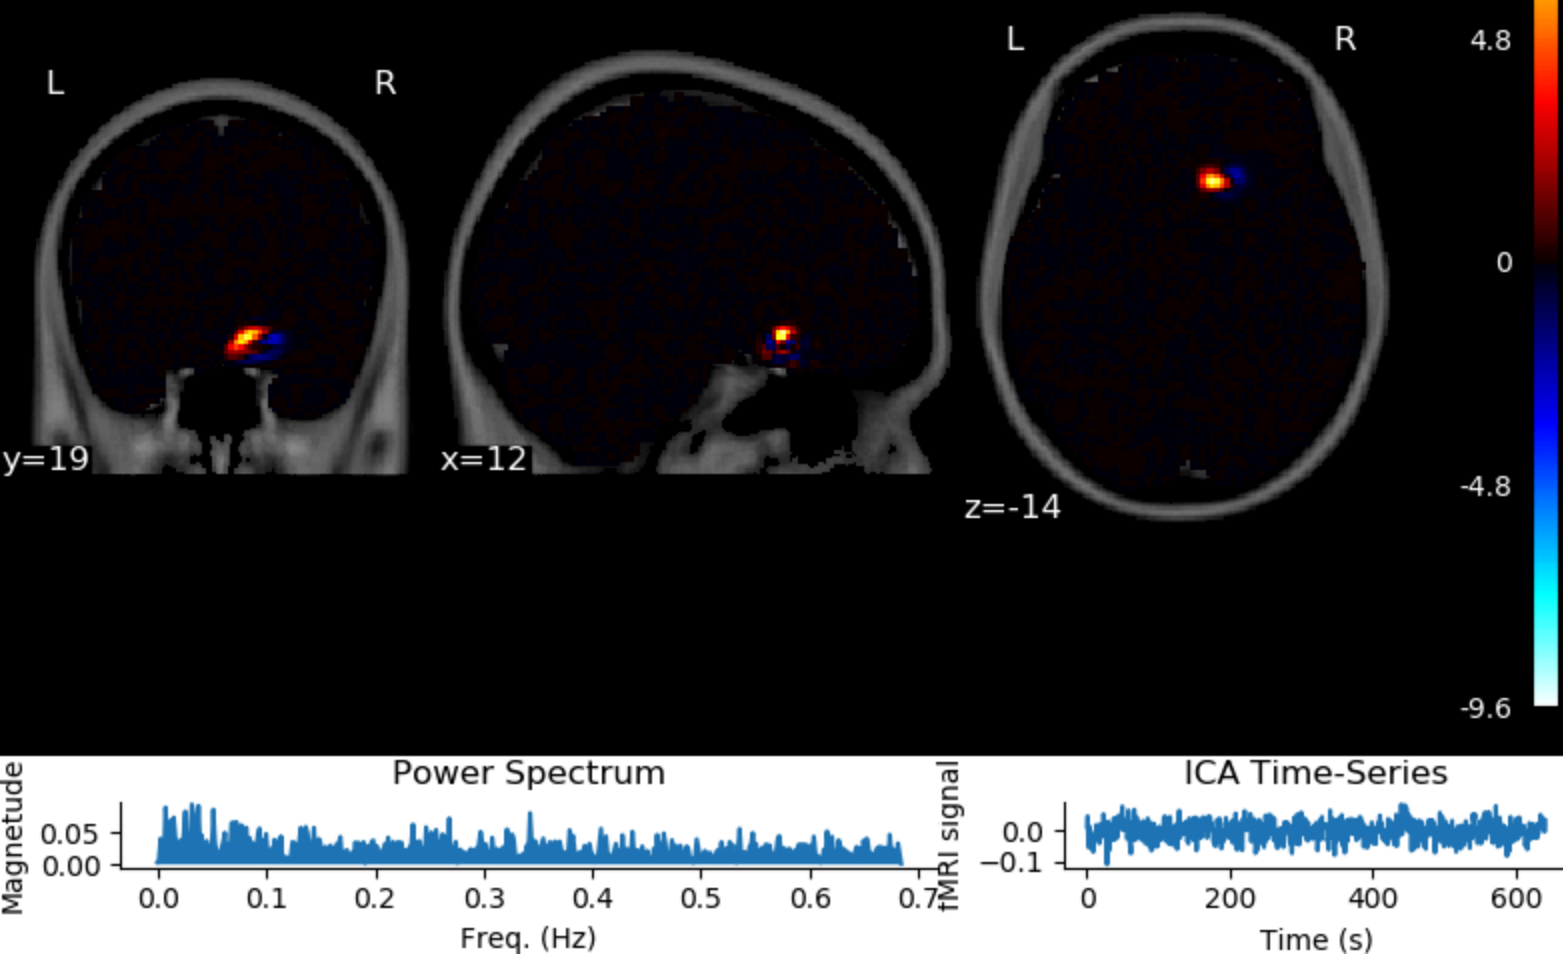



ICA200,198

ICA component: HCP-mean\_component\_ica\_s\_all\_198

ICN template: ...Noise\_artifact

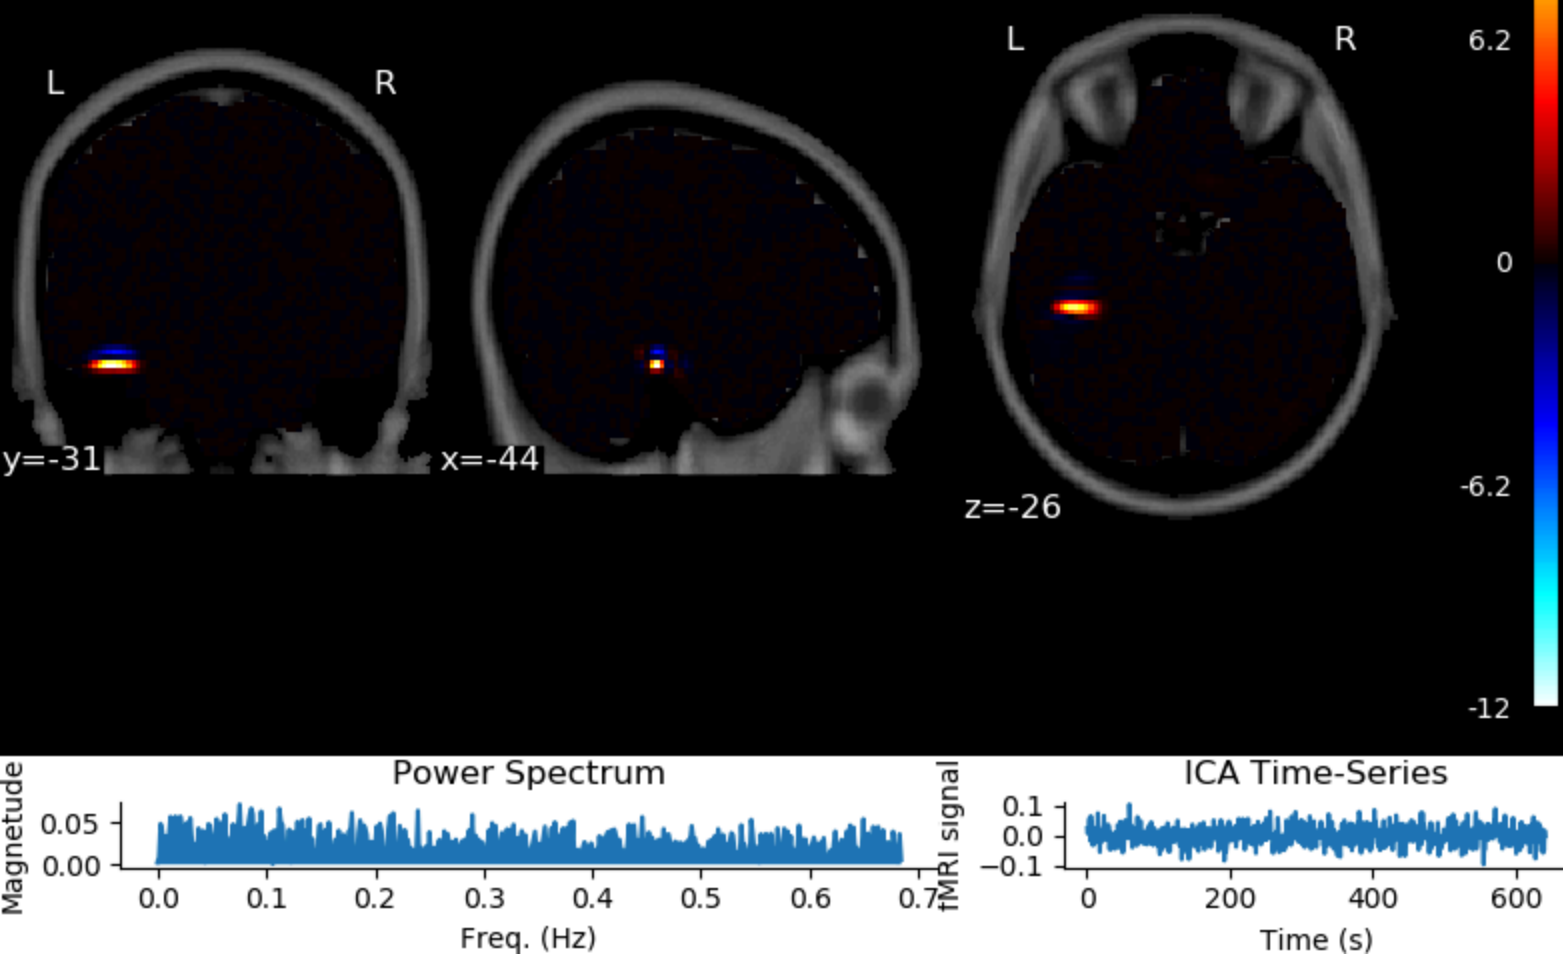

ICA200,199

ICA component: HCP\_mean\_component\_ica\_s\_all\_199

ICN template: ...Noise\_artifact

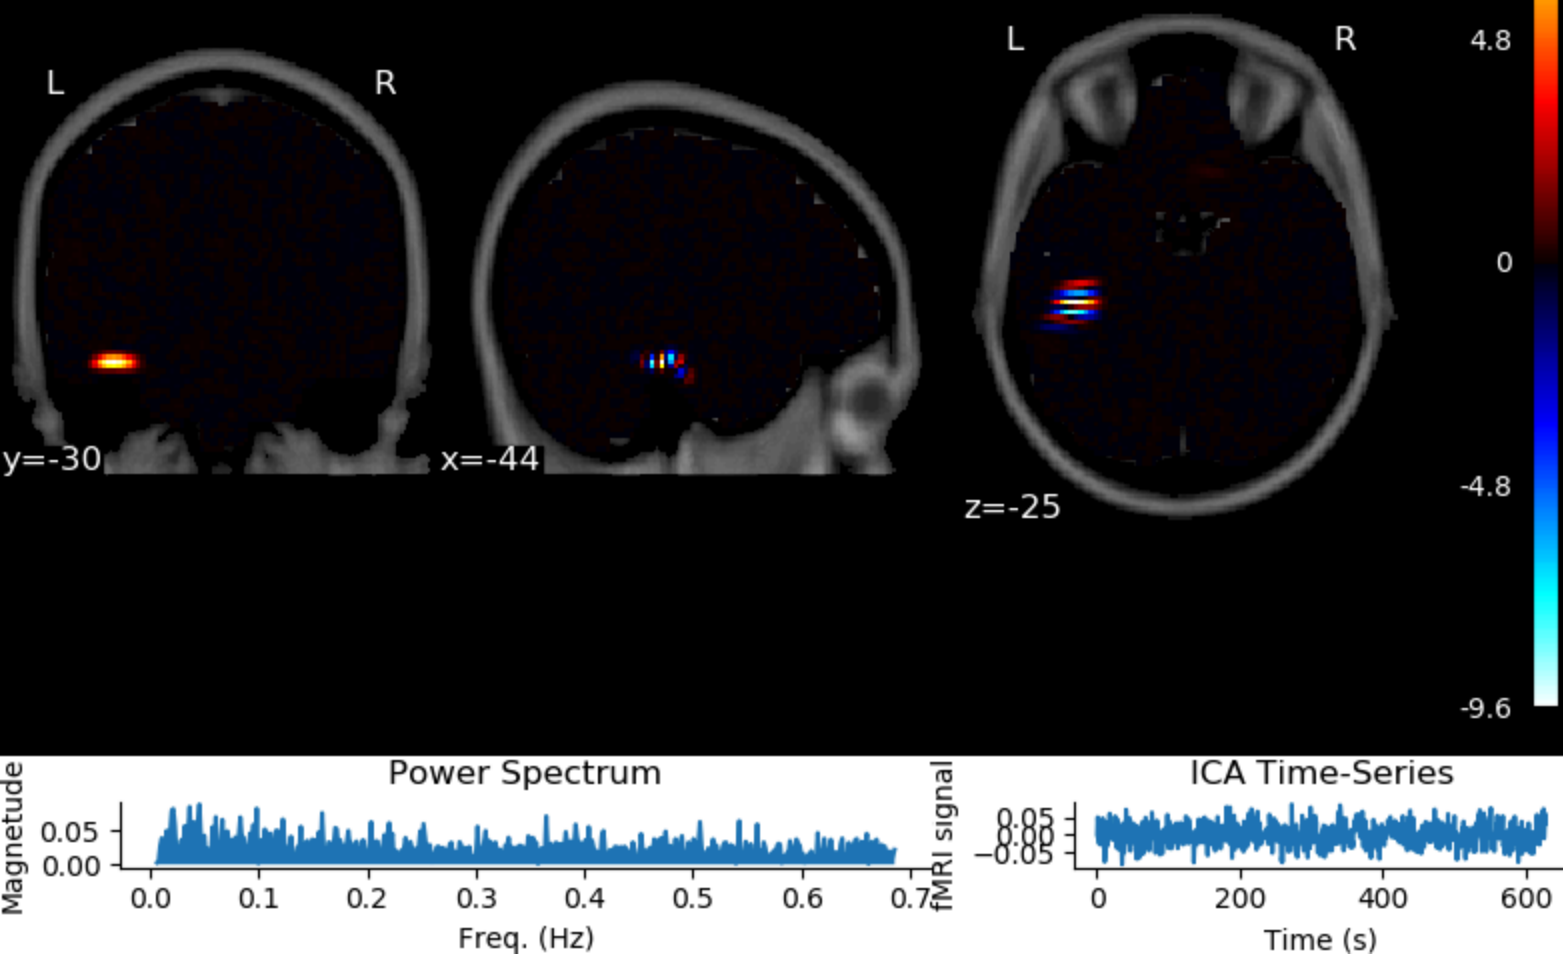

Supplement: Supplementary file [file 27907686]
